# Supplementary material for: A long-life lithium-oxygen battery via a molecular quenching/mediating mechanism
Source: Research Square preprint supplement (doi:10.21203/rs.3.rs-534571/v1), 2021-06-03
Supplement: Supplementary file 1 [file 3b93323f1ae1907c42cb9c9c.docx]

**A long-life lithium-oxygen battery *via* a molecular quenching/mediating mechanism**

**Jinqiang Zhang1**†**, Yufei Zhao1,5**†**, Bing Sun1,*, Yuan Xie1, Anastasia Tkacheva1, Feilong Qiu4, Ping He4, Haoshen Zhou4, Kang Yan1, Xin Guo1, Shijian Wang1, Andrew M. McDonagh1, Zhangquan Peng2,*, Jun Lu3,*, Guoxiu Wang1,***

1. Centre for Clean Energy Technology, Faculty of Science, University of Technology Sydney, Broadway, Sydney, NSW 2007, Australia.

2. Dalian Institute of Chemical Physics, Chinese Academy of Sciences, 457 Zhongshan Road, Dalian, 116023, PR China

3. Chemical Sciences and Engineering Division, Argonne National Laboratory, 9700 South Cass Avenue, Lemont, Illinois 60439, United States.

4. Centre of Energy Storage Materials & Technology, College of Engineering and Applied Sciences, Jiangsu Key Laboratory of Artificial Functional Materials, National Laboratory of Solid-State Microstructures and Collaborative Innovation Centre of Advanced Microstructures, Nanjing University, Nanjing 210093, China

5. Particles and Catalysis Research Laboratory, School of Chemical Engineering, The University of New South Wales Sydney, NSW 2052, Australia.

*Correspondence to: Bing.Sun@uts.edu.au, zqpeng@dicp.ac.cn, junlu@anl.gov, Guoxiu.Wang@uts.edu.au

† These authors contributed equally to this work.

**Experimental**

***Synthesis of PDI-TEMPO***

The detailed synthesis process of N,N’-di-(2,2,6,6-tetramethyl-1-oxyl-4-piperidinyl)-perylene-3,4,9,10-tetracarboxylic diimide (PDI-TEMPO) is illustrated in Figure S1a.1,2


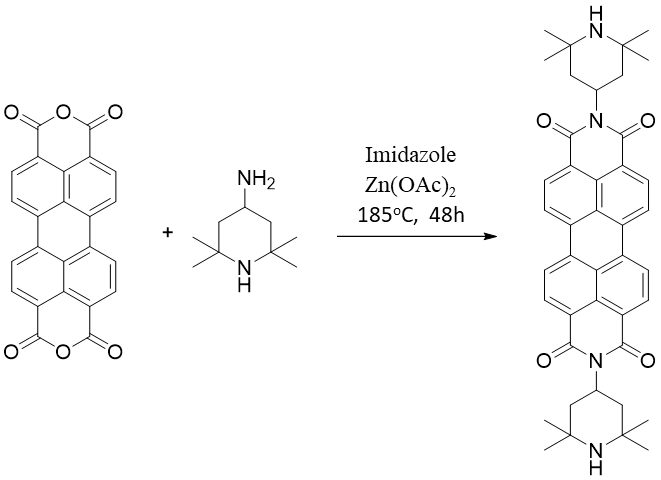


In brief, 0.51 ml (3 mmol) 4-amino-2,2,6,6-tetramethylpiperidine (Sigma-Aldrich), 0.588g (1.5 mmol) perylene-3,4,9,10-tetracarboxylic dianhydride (Sigma-Aldrich), and 0.279g (1.5 mmol) zinc acetate (Sigma-Aldrich) were together with 25 g imidazole (Sigma-Aldrich) in a round bottle flask. The flask was evacuated and refilled with argon three times and then heated with a sand bath at 120 ˚C for 3 h, 160 ˚C for 3 h, 200 ˚C for 3 h, and finally 240 ˚C for 48 h. After the mixture cools down to ~80 ˚C, 200 mL CHCl3 was carefully added to the flask. The clear red solution was extracted by separatory funnel and washed with 50 ml water for 5 times. The obtained organic phase was then collected dried over MgSO4 and concentrated under reduced pressure to yield a purple solid (PDI-TEMPH).


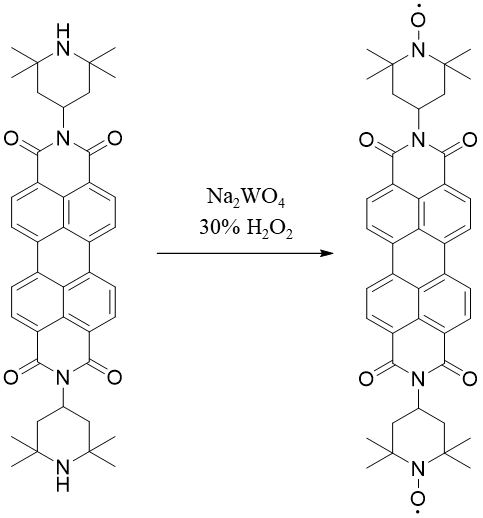


The resulting compound PDI-TEMPH was further oxidized by dissolving in methanol at room temperature together with a catalytic amount of Na2WO4∙2H2O (Sigma-Aldrich) and 5 mL 30% H2O2 (Chem-suppy).3,4 The mixture was stirred at room temperature for 24 h. After the reaction, the solvents were removed through rotavapor (Buchi R-100) and isopropanol (Sigma-Aldrich) was added to dissolve the crude product. After filtration, the filtrate was collected and dried under vacuum at room temperature. PDI-TEMPO was obtained as a purple-reddish solid. The solid was dried under vacuum for 24 h before storing in the argon-filled glovebox.

***Characterizations***

The 1HNMR spectra were recorded on an Agilent 500 Spectrometer at 25 oC in d-chloroform. The infrared spectroscopy measurements were conducted on a Nicolet Magna 6700 FT-IR spectrometer. All spectra were obtained using 4 cm-1 resolution and 64 scans at room temperature. The spectra of ATR-FTIR were obtained using 4 cm-1 resolution and 16 scans at room temperature with Argon protection. A field emission scanning electron microscope (FESEM, Zeiss Supra 55 VP) was employed to observe the electrode morphologies. Nitrogen-sorption measurements were carried out at 77 K with a Micromeritics 3Flex surface characterization analyzer. The specific surface area was calculated by Brunauer-Emmett-Teller (BET) method. Ultraviolet-visible (UV-Vis) spectroscopy was conducted through an Agilent Cary 60 UV-Vis spectrophotometer, scanning from 800 nm to 200 nm. All the ESI-MS spectra were recorded on Waters LC-MS system with the condition setting as follows: the capillary voltage as 3.0 KV, extractor voltage 2.0 V, RF Lens 0.5 V, source temperature 120 oC, desolvation temperature 200 oC, desolvation gas flow 500 L h-1, pump flow 20 µL min-1. Sample concentration was 1-5 mg mL-1 in MeOH, and the cone voltage was varied from 15 to 80V depending on the samples. Electron paramagnetic resonance (EPR) was collected using Bruker EMX X-Band ESR Spectrometer. EPR spectra were obtained under 120 K and then normalized based on the weight of the samples used for measurement. X-ray diffraction (XRD) measurement was performed on a Bruker D8 X-ray diffractometer using Cu Kα radiation. For the XRD analysis, the electrodes from the disassembled cells were washed and dried first, and then sealed with “Parafilm”™ to exclude moisture and carbon dioxide from the discharge products, which are very sensitive to normal atmospheric air components.

***Electrochemical characterizations***

All the electrochemical characterizations were conducted on a CH Instrument 660E electrochemical workstation and Biologic VMP3 potentiostat. The cyclic voltammetry (CV) for two-electrode configuration was operated by using a lithium metal foil as the anode, glassfibres as separator soaking with electrolyte, and a porous electrode as the cathode. Carbon paper electrodes were prepared by stacking three layers of pre-cut carbon papers (10 mm diameter). CNT cathodes were prepared by casting the slurry of CNT and PTFE (8:2) in iso-propylene/water on the pre-cut carbon paper and dried before use. Porous graphene electrodes (PGEs) were prepared *via* the same method.5 The electrolyte was prepared by dissolving 5 mM PDI-TEMPO in DEGDME with 0.5 M LiTFSI. The scan rate was 0.5 mV s-1. The CV for three-electrode configuration was operated with a Pt wire as the counter electrode, an Ag wire as the reference electrode, and a glassy carbon (GC) electrode as the working electrode. The scan rate was 100 mV s-1.

The discharge/charge performances were evaluated by a Neware Battery Testing System. The discharge-charge performances were evaluated by assembling Li-O2 batteries. A two-electrode Swagelok-type cell with an air hole (0.785 cm2) on the cathode side was used to test the electrochemical performances. A two-electrode coin cell (CR2033, Neware) with several open holes on the cathode side was used for long-term cycling. The cells were assembled in an argon-filled glove box with water and oxygen level less than 0.1 ppm. Lithium foils were used as anodes, and PVDF/glassfibres were used as separators. The lithium foils were immersed in propylene carbonate (PC) solution containing 5 % fluoroethylene carbonate (FEC) for 5 days before use. A Nafion membrane was used between the lithium anode and separator for long-term cycling. The electrolytes were prepared by dissolving 0.5 M LiTFSI in DEGDME with 5 mM PDI-TEMPO. The typical amount of electrolyte used in a single cell was 150 µL. The assembled cell was gas-tight except for the cathode side window, which is exposed to the oxygen tank. All measurements of Li-O2 batteries were conducted in a gas tank of 1 atm dry oxygen atmosphere. The capacities of the batteries were calculated based on the total area of the electrodes. Galvanostatic intermittent titration technique (GITT) was performed using a Li-O2 cell at a current density of 0.1 mA cm-2. A 1 h/3h rest step was given after 10 min of each discharge and charge step. The cut-off capacity was set to 0.5 mAh cm-2.

A modified Swagelok-type Li-O2 cell was linked to a commercial magnetic sector mass spectrometer (Thermo Fischer) by a specially designed gas-purging system for *in-situ* DEMS measurement. The flow rate of purge gas was set at 1 mL min−1. During the charge process, high-purity Ar was used as the carrier gas. The DEMS cells were assembled in the argon-filled glove box for the electrochemical testing.

The rotating ring-disk electrode (RRDE) measurements were performed using a rotating ring disk electrode with a GC disk and a Pt ring (Pine Research Instrumentation, USA).6 A home-made three-electrode configuration was used with Pt wire as the counter electrode, Ag wire as the reference electrode, and RRDE as the working electrode. The electrolytes used for the measurements were the DEGDME electrolyte and PDI-TEMPO electrolyte. In order to prevent potential mask effect by the redox current of PDI-TEMPO, the PDI-TEMPO electrolyte was prepared by dissolving 0.5 mM PDI-TEMPO in the DEGDME electrolyte. The rotation speed of the RRDE was held at 1600 rpm for the tests. To ensure the generation of currents for oxygen evolution reaction (OER) and oxygen reduction reaction (ORR) from both electrolytes during the tests, an oxidation potential was held constantly at 4.1 V *vs.* Li/Li+, and a reduction potential was held constantly at 2.3 V *vs.* Li/Li+. As the currents generated for OER come from the consumption of Li2O2 which was generated during the ORR process, the tests of the OER efficiency was conducted straight after tests of the ORR efficiency. The tests of the ORR efficiency were carried out in the oxygen atmosphere, and the ones of the OER efficiency were in the argon atmosphere. To further eliminate the currents from side-reactions and self-redox reactions, a control experiment was carried on using the same setting, only operated all the measurements in the argon atmosphere. The calculation of the efficiency could be corrected by the equation below:

The Iring and Idisk are the currents obtained on the ring and disk electrode during the ORR and OER process. The Iring-correction and Idisk-correction are the currents obtained on the ring and disk electrodes during the control experiment. More details will be found in the supplementary illustration in Figure S17-18.

***Theoretical calculations***

The highest occupied molecular orbital (HOMO) and lowest unoccupied molecular orbital (LUMO) in this work were performed with the Gaussian 09 program, through the conventional density functional theory (DFT) calculations using the hybrid exchange-correlation functional B3LYP on the molecules. The Basis Set was TZVP.7-9

***Demonstration experiments***

The demonstration experiments of the scattering of Li2O2 during the discharge process was performed by assembling the Li-O2 cell through a special configuration. A carbon paper was added between the lithium anode and the glassfibre separator. CNT electrodes were used as cathodes in the cell. The cell was directly discharged to 2.0 V at a current density of 0.1 mA cm-2. The inserted carbon paper was taken out for SEM, and the glassfibre was taken out for phenolphthalein tests. The phenolphthalein tests were performed by firstly soaking the glassfibre into 3 ml water. Then two drops of fresh-made phenolphthalein/ethanol solution were added to the aqueous solution dropwise. The colour-changing process was recorded by video and photoshoots.

The demonstration of the capacity loss during the charge process was performed by changing the electrolyte/separator after the discharge process. The Li-O2 cells with different electrolyte configuration were firstly discharged to 0.25 mAh cm-2 at a current density of 0.1 mA cm-2. The cells were then taken to an argon-filled glovebox and dissembled. The cathodes were washed with clean DEGDME solvent three times and dried under vacuum. The dried cathodes were then assembled into Li-O2 cells with fresh lithium metal anodes, a glassfibre separator soaked with DEGDME electrolyte. The as-assembled cells were then directly charged to 4.6 V at a current density of 0.1 mA cm-2.

The demonstration of the suppression of 1O2 during cycling was performed by adding 20 mM 9,10-dimethylanthracene (DMA) in all the electrolytes. In order to avoid possible reactions between lithium metal and DMA, a LiFePO4/C electrode was used instead of the lithium metal foil as the anode. The Li-O2 cells were cycled with a capacity of 0.25 mAh cm-2 at a current density of 0.1 mA cm-2. The cells were then taken to an argon-filled glovebox and dissembled. All the battery components were soaked in 9 mL DEGDME solvent. UV spectra were performed on the extracted solution. A reference was prepared by resting the bare DEGDME electrolyte with 20 mM DMA in oxygen for the same time of each cycling period to monitor the self-degradation of DMA in O2.

**Supplementary Figures**


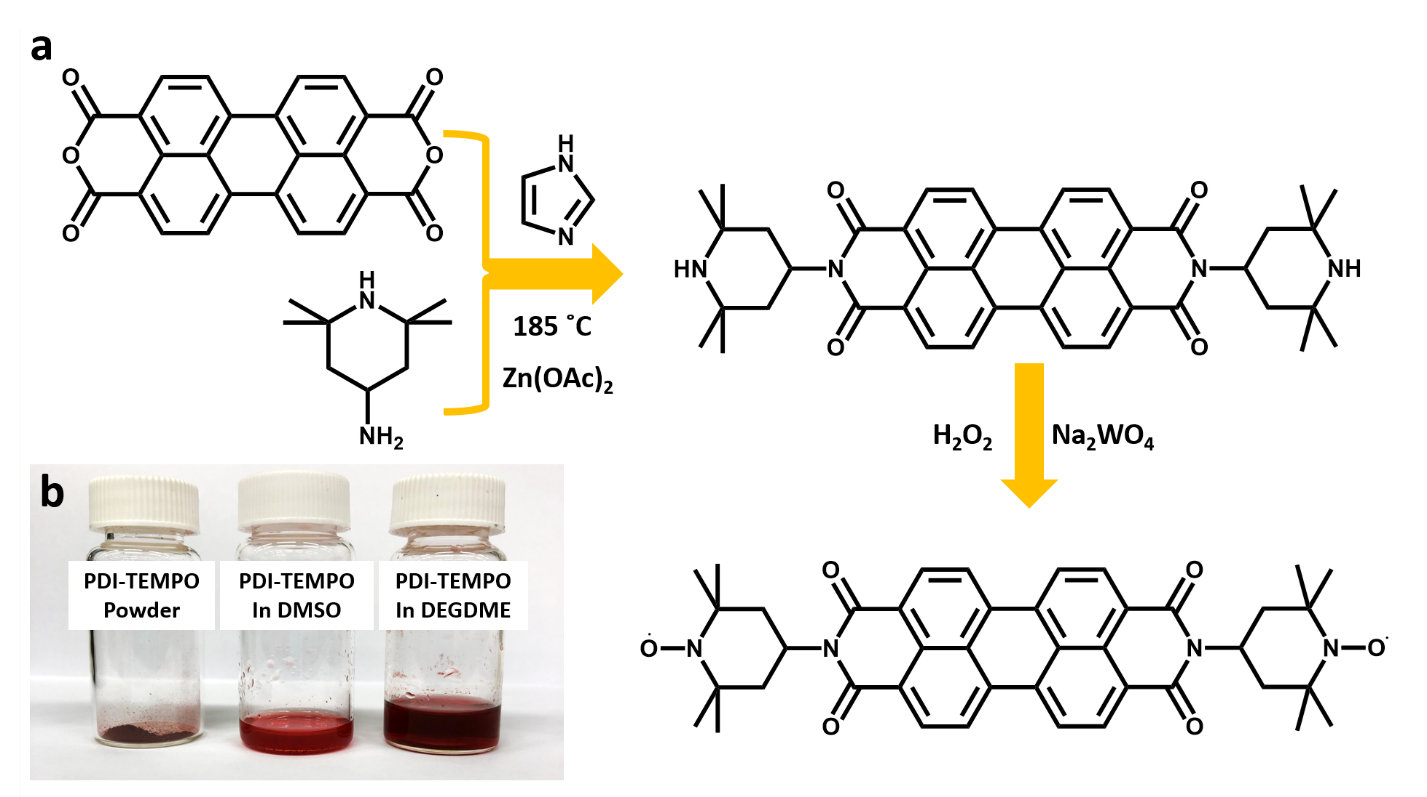


**Figure S1 | The synthesis of PDI-TEMPO.** **a.** Schematic illustration of the synthesis approach of PDI-TEMPO. **b.** The physical appearance of the as-synthesized PDI-TEMPO powder (left), the PDI-TEMPO/DMSO solution (middle), and the PDI-TEMPO/DEGDME solution (right).

The as-synthesis PDI-TEMPO has a purple-red colour. Interestingly, the colours of the PDI-TEMPO solutions are slightly different when using different organic solvents. The DMSO solution appears to be red, while the DEGDME solution has a colour close to purple. Furthermore, the colour of the solution gradually changes to pink when lowing the concentration.


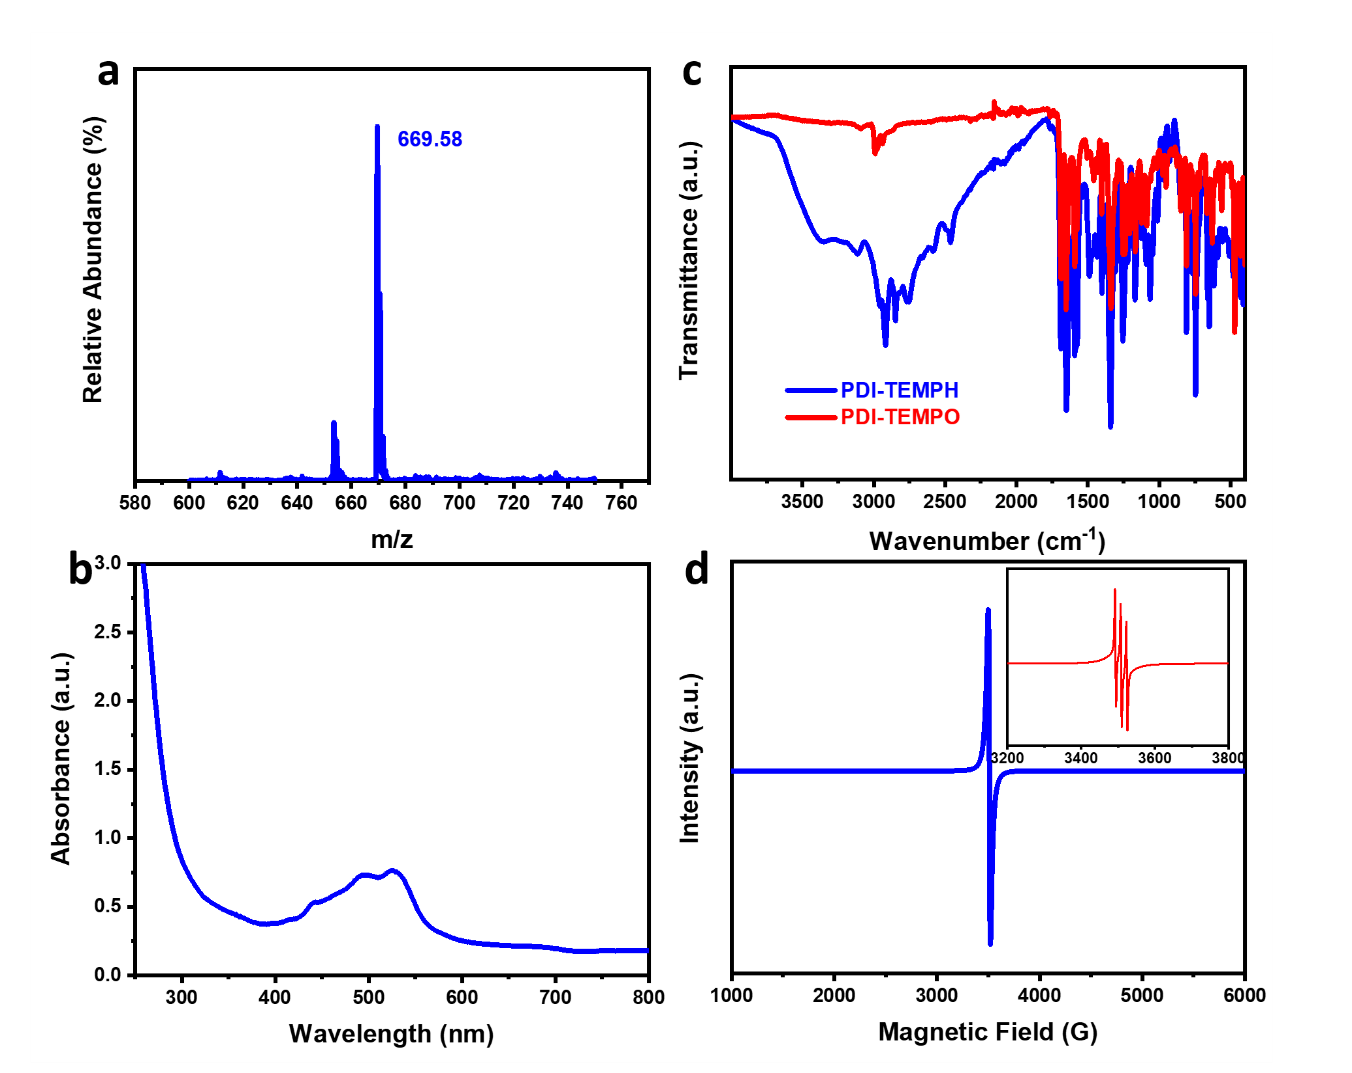


**Figure S2 | Characterizations of PDI-TEMPH and PDI-TEMPO.** **a.** The mass spectrometry of the PDI-TEMPH. **b.** The UV spectrum of the PDI-TEMPO in DMSO solvent. **c.** The FTIR spectra of the PDI-TEMPH and PDI-TEMPO. **d.** The EPR spectra of the PDI-TEMPO in solid-state and DMSO solution (inset).

The mass spectrometry was performed on PDI-TEMPH instead of the final radical product PDI-TEMPO, as the free radicals may affect the spectrometry result. As shown in Figure S2a, the strongest peak at 669.58 refers to the molecular mass of PDI-TEMPH (668+1), demonstrating the successful synthesis of the precursor PDI-TEMPH. The FTIR spectra of both PDI-TEMPH and PDI-TEMPO show high peak intensity around 1650 and 1680 cm-1, corresponding to the amide groups.10 The peaks related to N-H groups disappears in the one of PDI-TEMPO, indicating that the N-H groups are oxidized into N-O radical groups. The UV spectrum in Figure S2b shows the characteristic peaks of perylene diimide. Furthermore, the EPR spectra of PDI-TEMPO prove the existence of N-O free radicals. Therefore, it can be concluded that PDI-TEMPO is successfully synthesized.


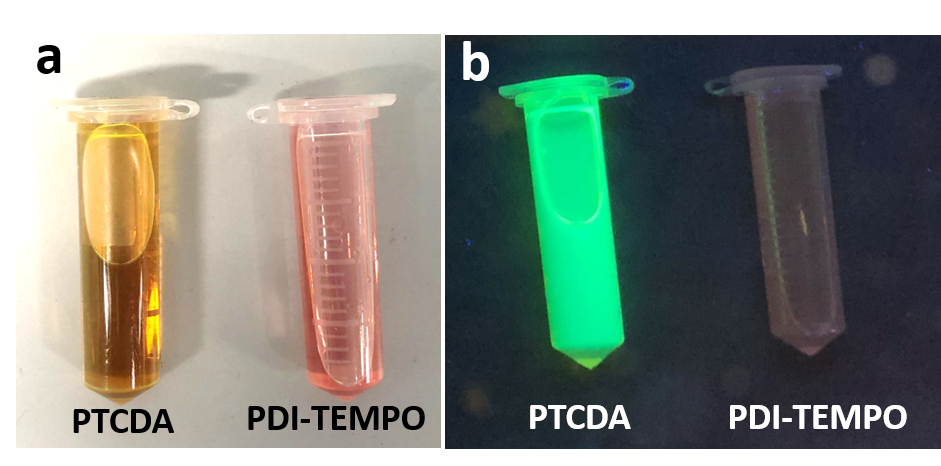


**Figure S3 | The quenching of the fluorescence capability of PDI backbone.** The PTCDA/water solution and PDI-TEMPO/DMSO solution under **a.** the normal light and **b.** UV light.

The precursor PTCDA was dissolved in KOH solution, due to its insolubility in most organic solvents. PDI-TEMPO was dissolved in DMSO as it could not be dissolved in the aqueous media. As shown in Figure S3b, the precursor showed strong fluorescence emission, owing to the large conjugated PDI backbone. Interestingly, the existence of TEMPO free radicals in the molecular structure could efficiently quench the fluorescence capability of the PDI backbone.11 It further confirms the successful grafting of TEMPO on PDI backbone.


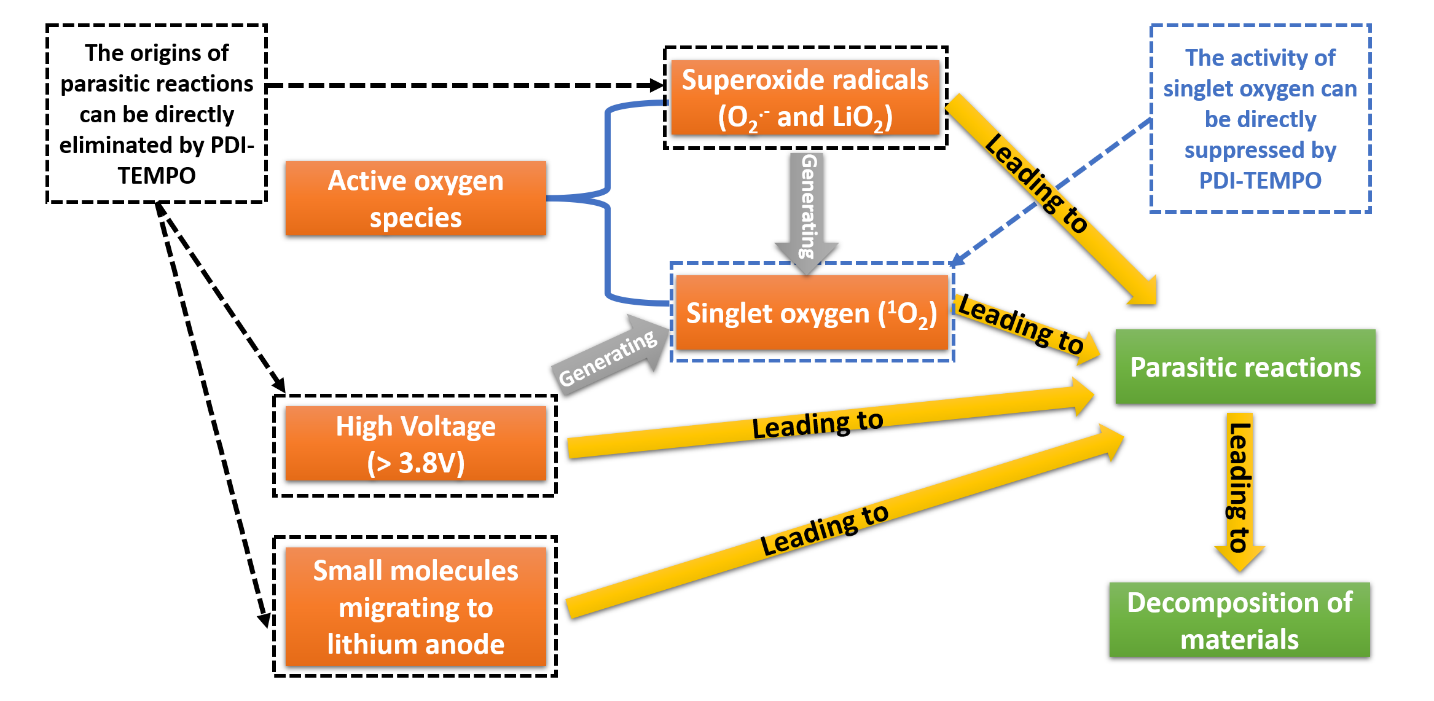


**Figure S4 | The illustration of PDI-TEMPO to comprehensive suppress parasitic reactions.** The decomposition mechanisms of materials use yellow arrows and the origins of singlet oxygen use gray arrows.
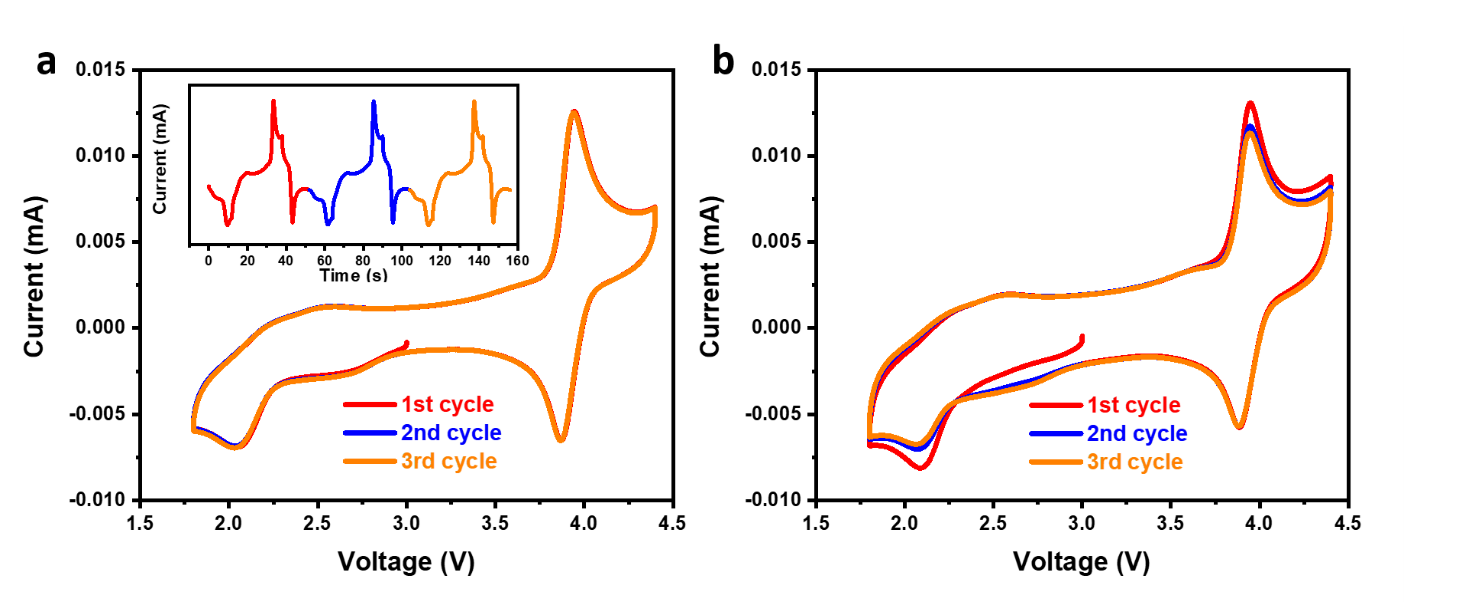


**Figure S5 | CV curves of three-electrode cells with PDI-TEMPO in an argon atmosphere a. before and b. after 25 cycles scan in an oxygen atmosphere.** The inset image is the curve of current vs. time. The scan rate is 100 mV s-1.

As shown in Figure S5b, the redox behaviors are similar to those before cycling (Figure S5a). The slight difference between the first cycle and the following cycle is probably due to the remaining Li2O2/O2 in the electrode/electrolyte during the scanning in oxygen. But the curves of the second and third cycles are almost identical, verifying the redox reactions are still highly reversible after cycling. This verifies that the PDI-TEMPO molecule is highly stable during cycling.


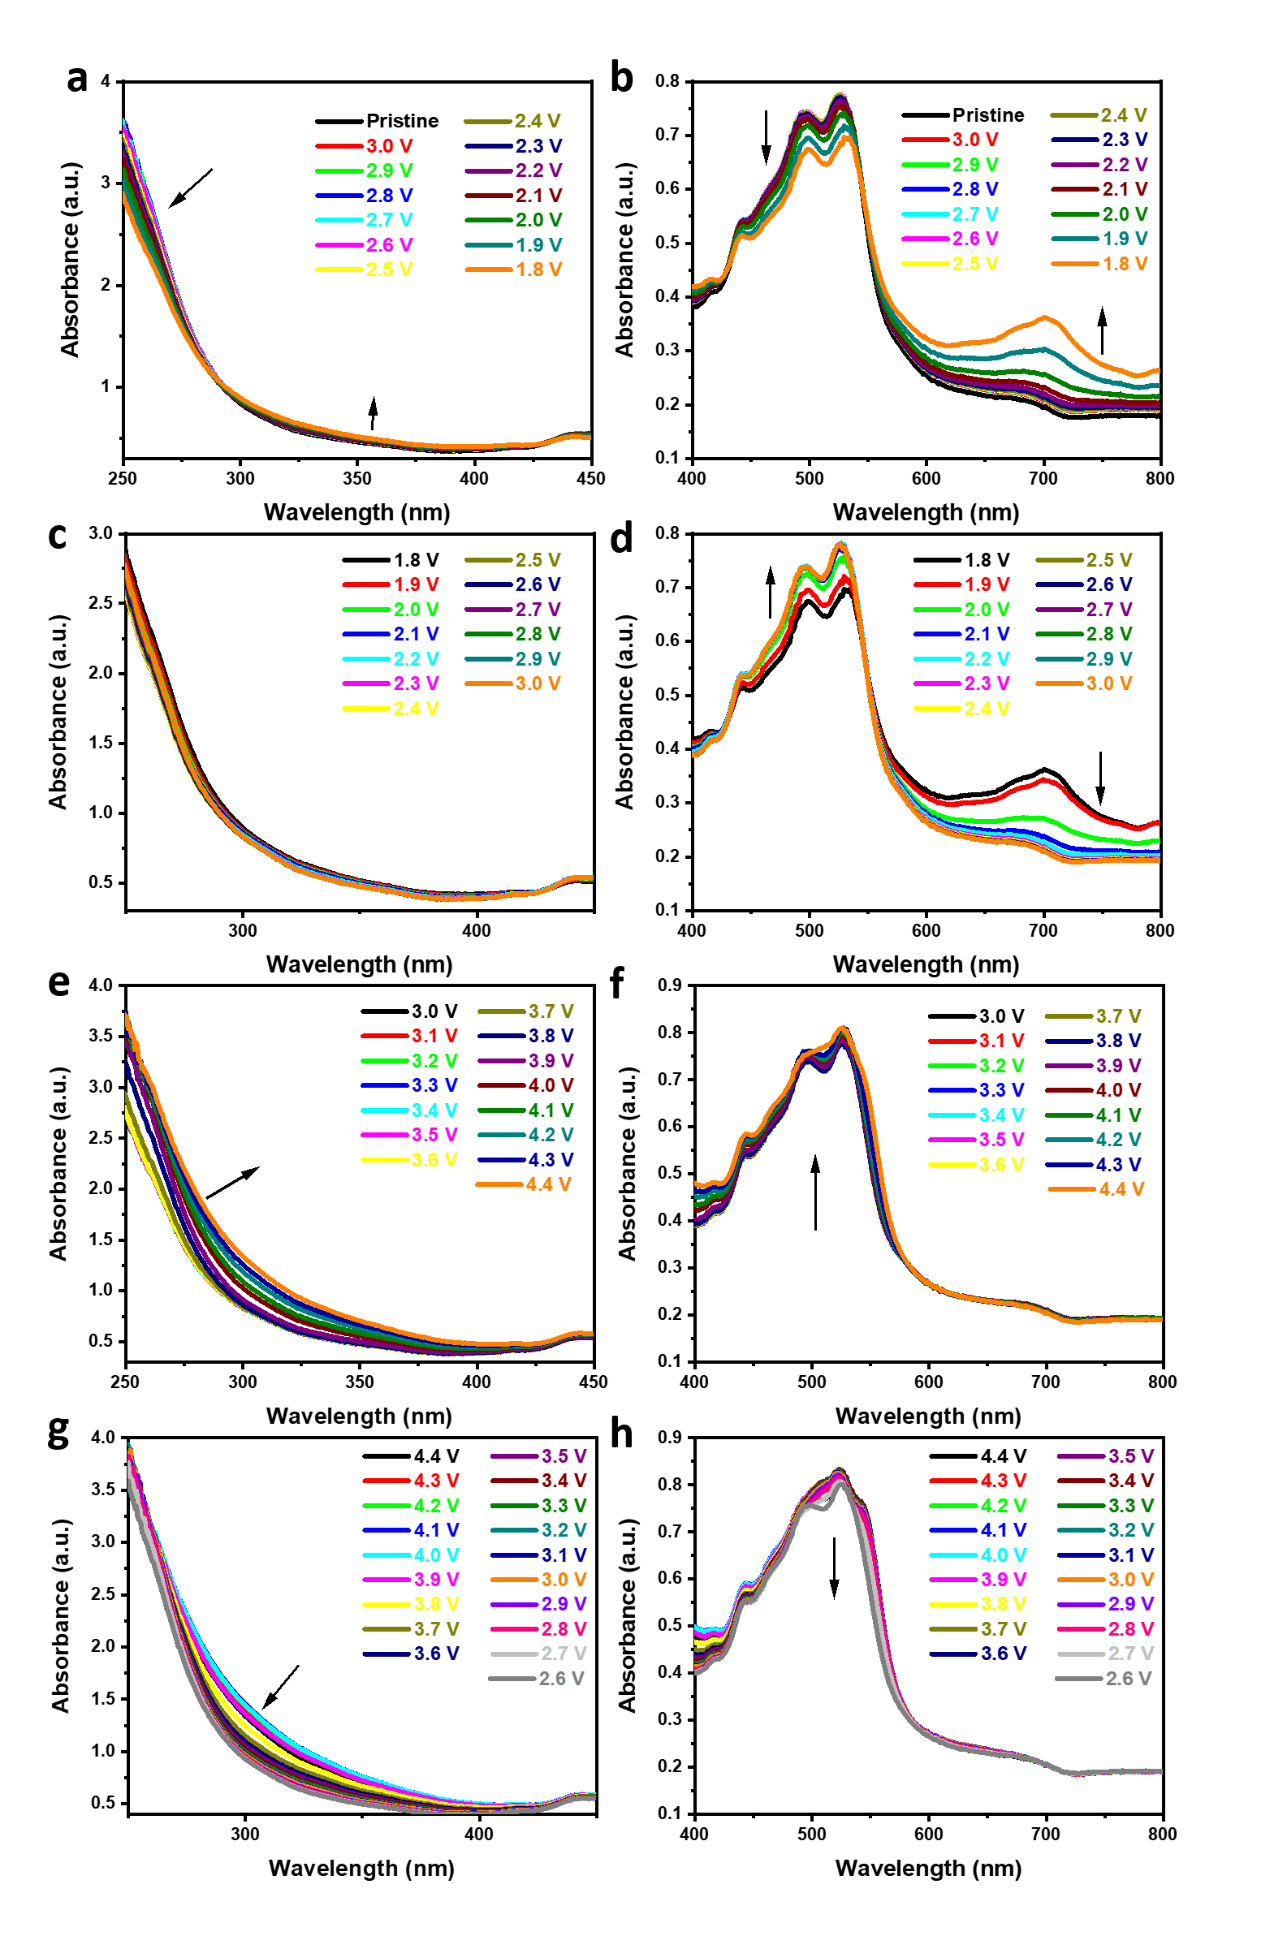


**Figure S6 | The UV spectra of the PDI-TEMPO/DEGDME electrolyte during the *in-situ* tests.** The voltage range was set to **a-b.** 3.1-1.9 V, **c-d.** 1.9-3.1 V, **e-f.** 3.1-4.5 V, **g-h.** 4.5-2.7 V.


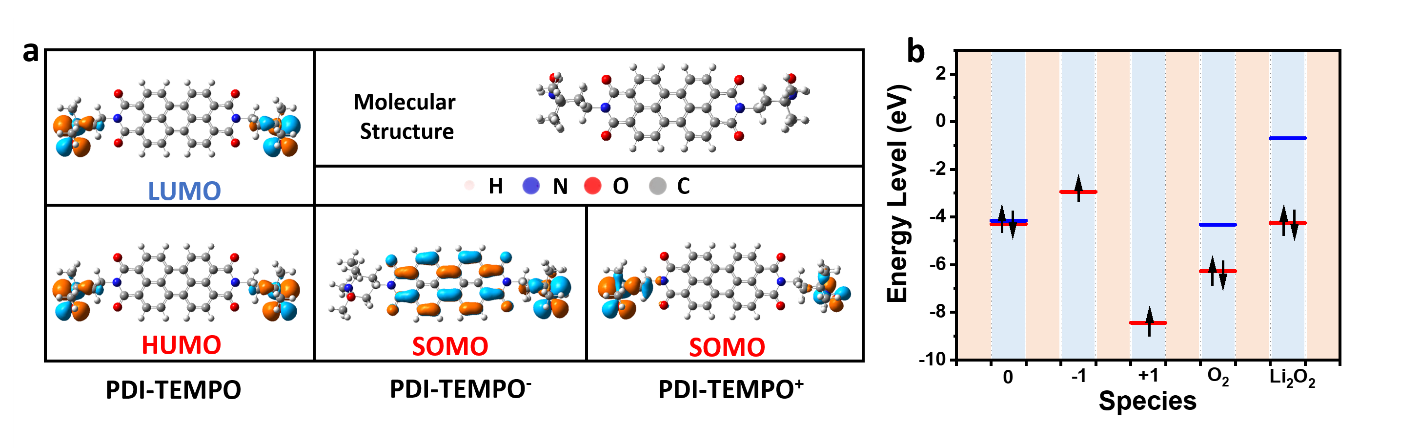


**Figure S7 | a.** DFT calculation of the visualized LUMO and HOMO/SOMO of PDI-TEMPO at different oxidation states, and **b.** their corresponding energy comparing to the O2 and Li2O2. The blue lines are the LUMO of the molecules, and the red lines are the HOMO/SOMO of the molecules. 0 refers to the neutral PDI-TEMPO, -1 refers to the reduced PDI-TEMPO (PDI-TEMPO-), and +1 refers to the oxidized PDI-TEMPO (PDI-TEMPO+). Arrows represent the electrons spinning in the orbitals.


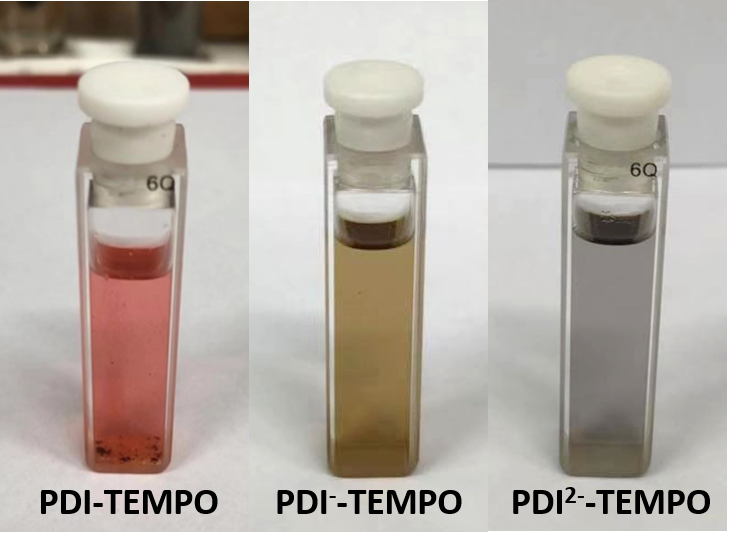


**Figure S8 | The digital photos of the PDI-TEMPO/DMSO solution at different reduction stage.**

The reduction of the PDI backbone was controlled by adding different amount of KO2 in the PDI-TEMPO/DMSO solution. As shown in Figure S8, the original PDI-TEMPO displays a red colour. The solution changed to brown and light blue when the PDI backbone was reduced into -1 and -2, respectively.1 The result indicates that the PDI backbone could be reduced by superoxide radicals in the solution.


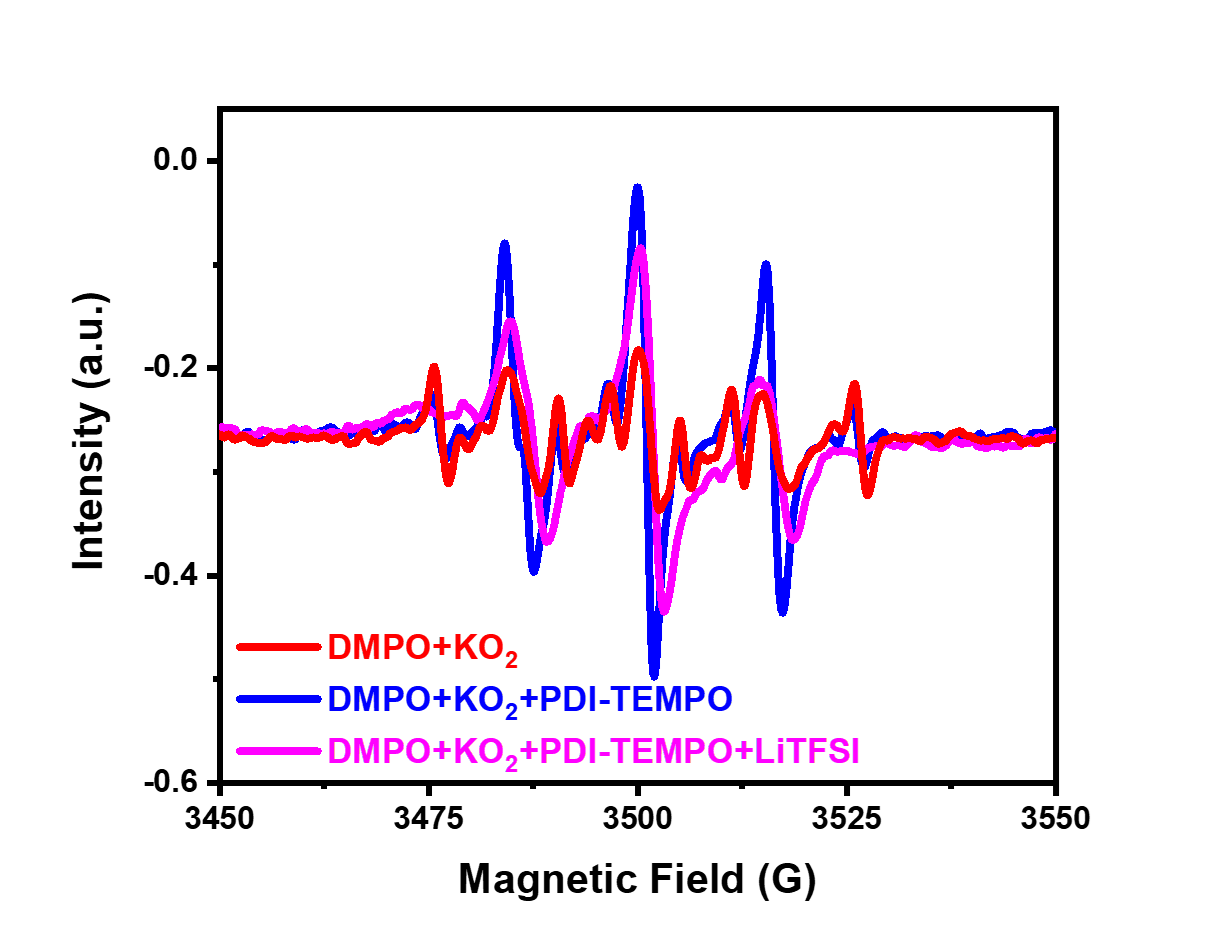


**Figure S9 | EPR spectra of the superoxide-saturated solution before and after adding PDI-TEMPO and LiTFSI.**

The intensities of the peaks related to the existence of superoxide radicals trapped by 5,5-dimethyl-1-pyrroline N-oxide (DMPO) decreased when PDI-TEMPO was added to the solution.12 The peaks vanished when LiTFSI was also added. This indicates that the superoxide radicals could be efficiently quenched by PDI-TEMPO with the aid of lithium salt.


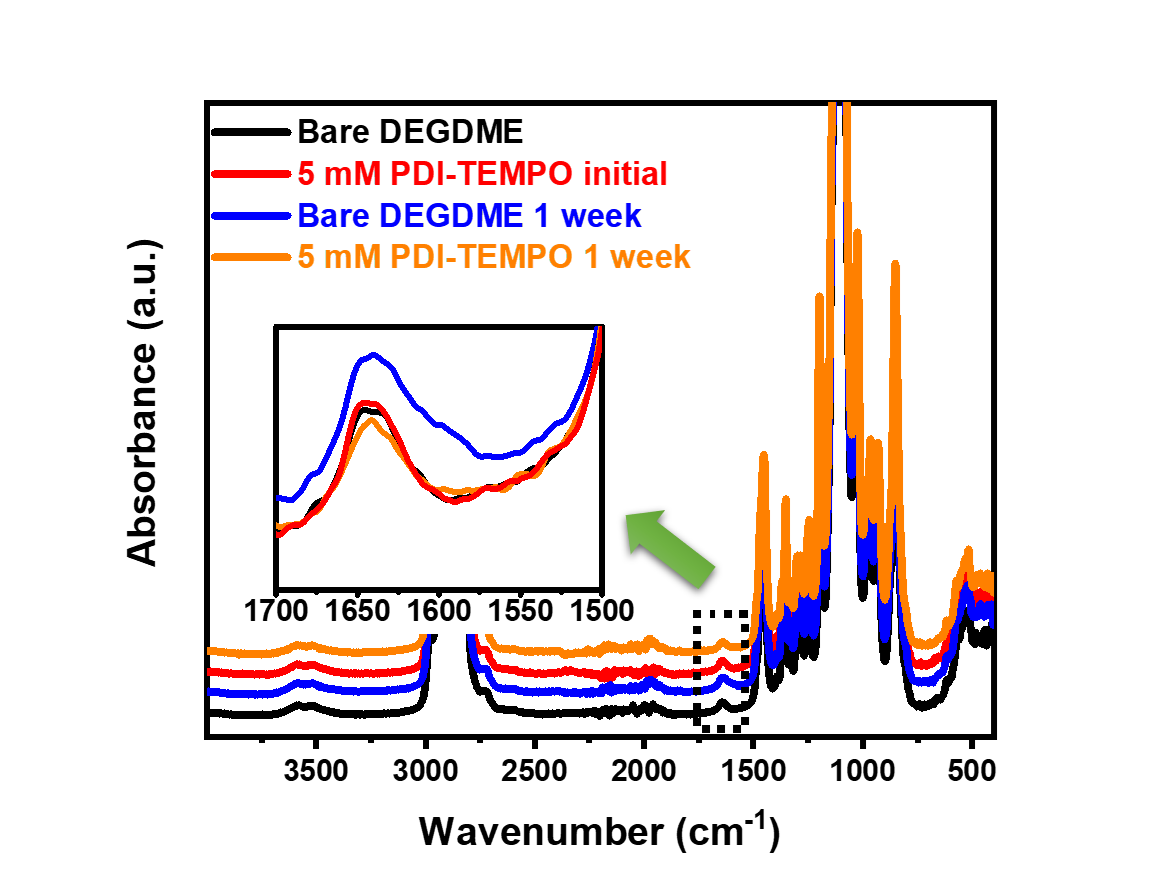


**Figure S10 | FTIR spectra of the KO2-soaked DEGDME solutions with and without PDI-TEMPO after one week.** The inset figure is the enlarged image of the stacked spectra in the range of 1500-1700 cm-1.


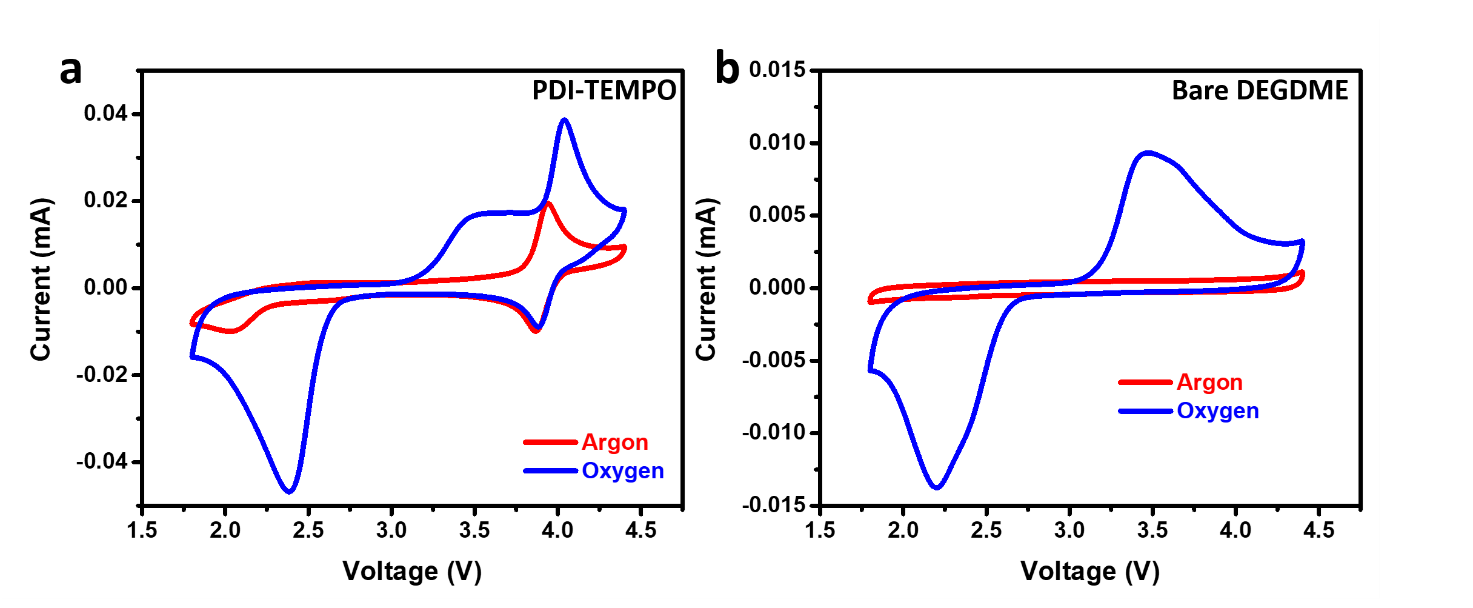


**Figure S11 | The CV curves of the three-electrode cells operated in the argon and oxygen atmosphere with different electrolyte: a.** PDI-TEMPO electrolyte and **b.** bare DEGDME electrolyte.The scan rate is 100 mV s-1.

The currents related to ORR and OER when operated in PDI-TEMPO electrolyte are significantly higher than those obtained in DEGDME electrolyte, indicates that the existence of PDI-TEMPO could efficiently enhance the ORR and OER process simultaneously.


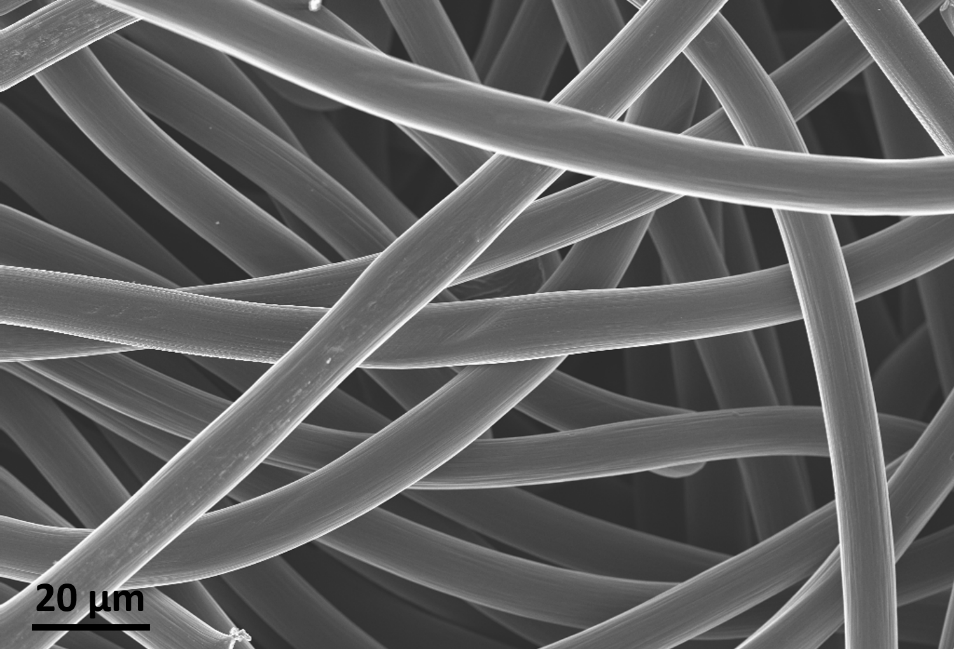


**Figure S12 | SEM image of the carbon paper electrode.**


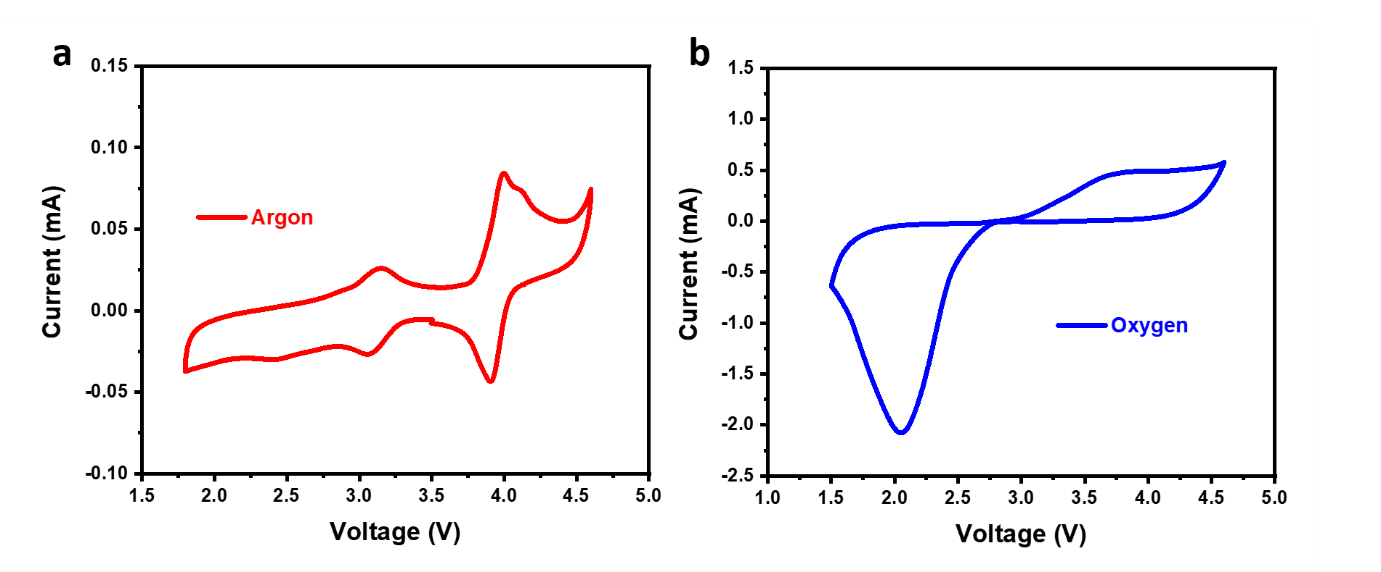


**Figure S13 | The CV curves of the two-electrode cells with PDI-TEMPO electrolyte operated in a. the argon atmosphere and b. the oxygen atmosphere.**  The scan rate is 0.5 mV s-1.


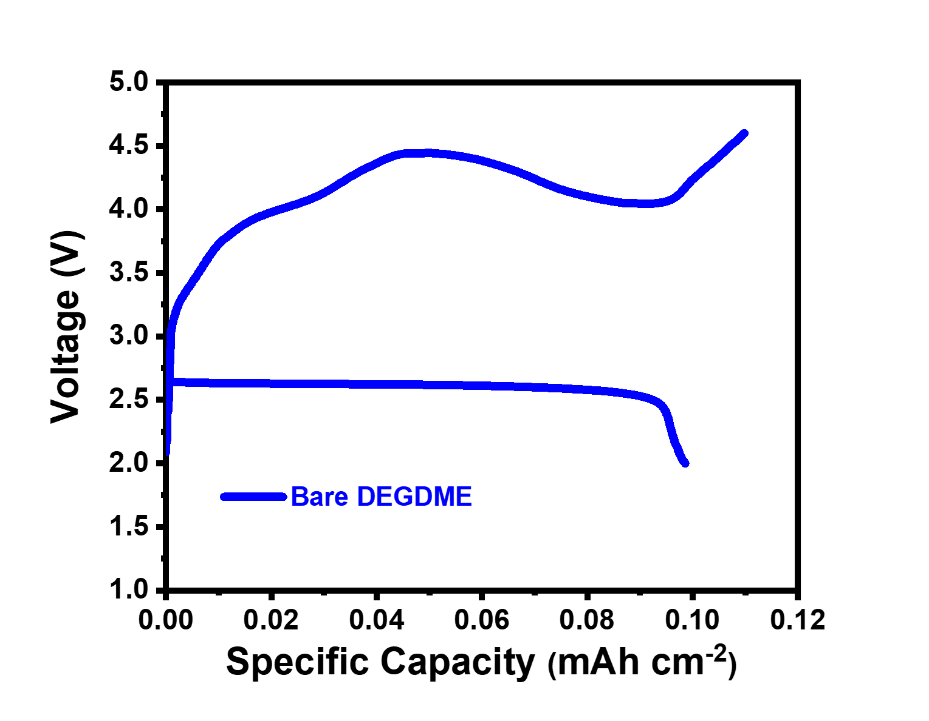


**Figure S14 | The discharge-charge profiles of the cell with bare DEGDME electrolyte in the oxygen atmosphere.**  It is the enlarged image from Figure 2a. The current density is 0.1 mA cm-2, and the cut-off voltage is set to 2.0/4.6 V.


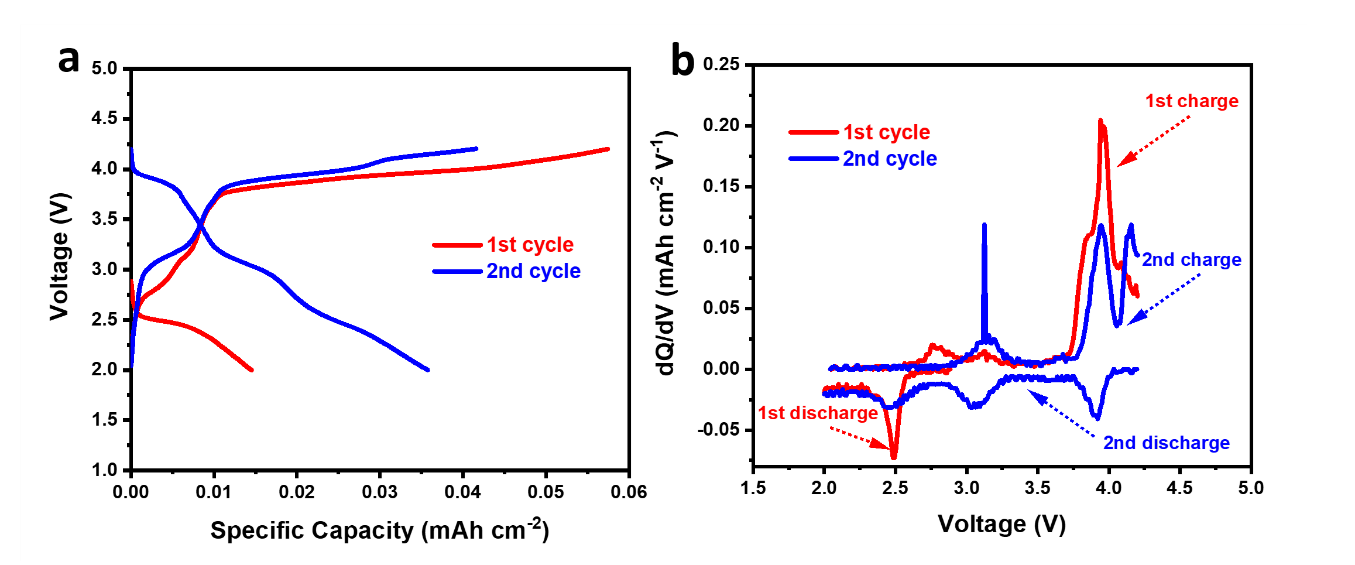


**Figure S15 | The discharge-charge profiles of the cell with PDI-TEMPO electrolyte in the argon atmosphere.**  The current density is 0.1 mA cm-2, and the cut-off voltage is set to 2.0/4.2 V.

The cell with PDI-TEMPO electrolyte operated in the argon atmosphere could provide capacity of less than 0.04 mA cm-2. Furthermore, the calculated dQ/dV *vs.* V shows similar curves to the CV results in Figure 1c, referring to the reversible chemical reactions of PDI-TEMPO.


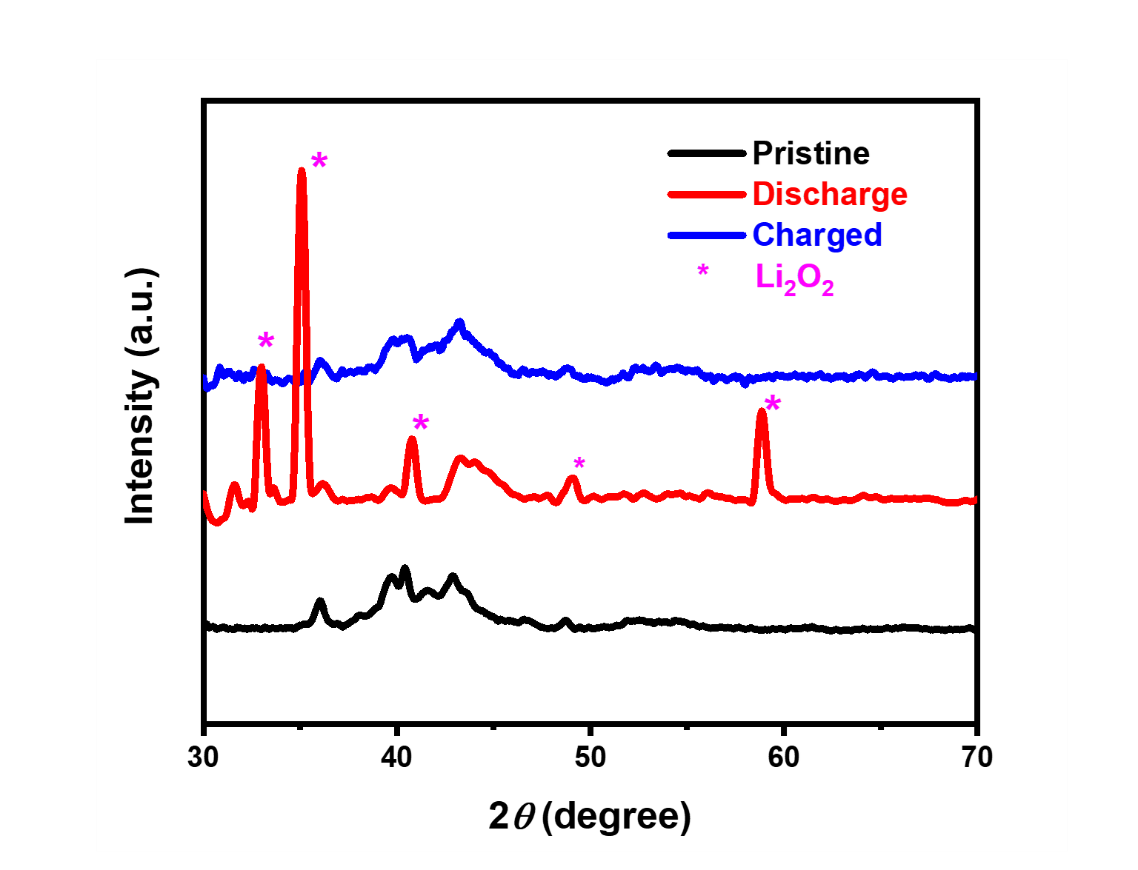


**Figure S16 | The XRD patterns of the carbon paper electrodes before and after the first cycle.**

The XRD pattern of the discharged electrode indicates that the discharge product was dominated by Li2O2. The peaks disappeared after the charge process, demonstrating highly reversible formation and decomposition of Li2O2 during the operation of Li-O2 batteries.


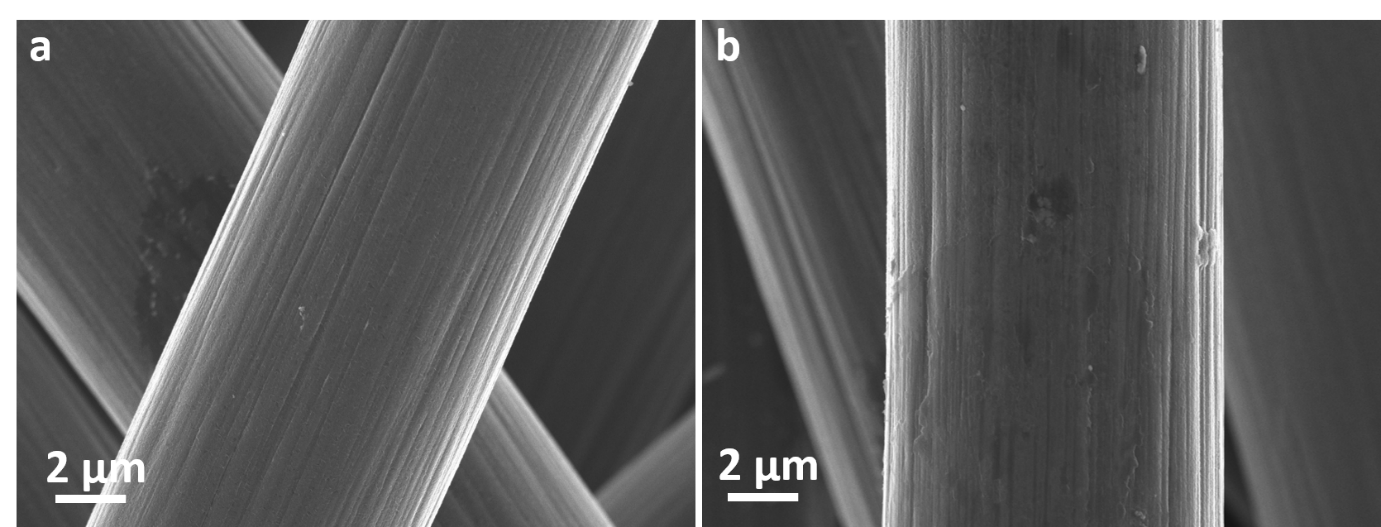


**Figure S17 | The SEM images of the charged carbon paper electrode with a. PDI-TEMPO electrolyte and b. DEGDME electrolyte.**

The SEM images show that no residue discharge products left on the charged carbon paper, indicating Li2O2 has been completely decomposed during the charge process.


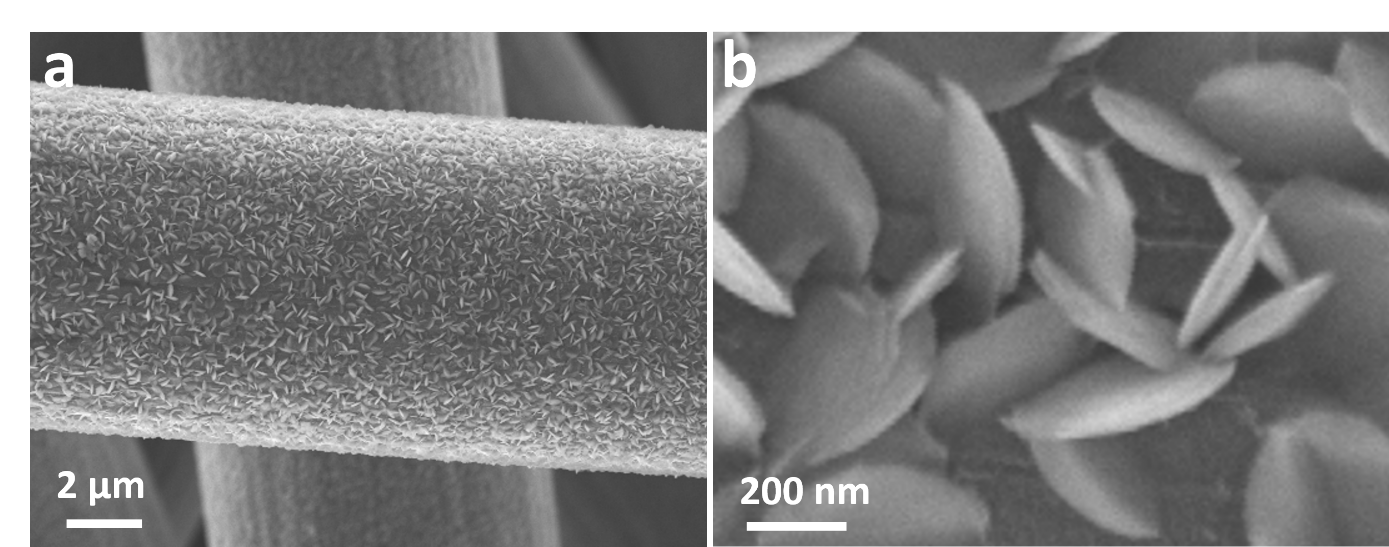


**Figure S18 | The SEM images of the discharge carbon paper electrode with a DEGDME electrolyte containing 2000 ppm water.**

The electrolyte was prepared by adding 2000 ppm water to enable solution-mediated discharge process. As shown in Figure S18, the carbon fibres are covered with large Li2O2 particles in toroidal shapes with a diameter of around 400-500 nm, which is consistent with most publications.13 There is also no particles found amongst the toroidal-shaped Li2O2.


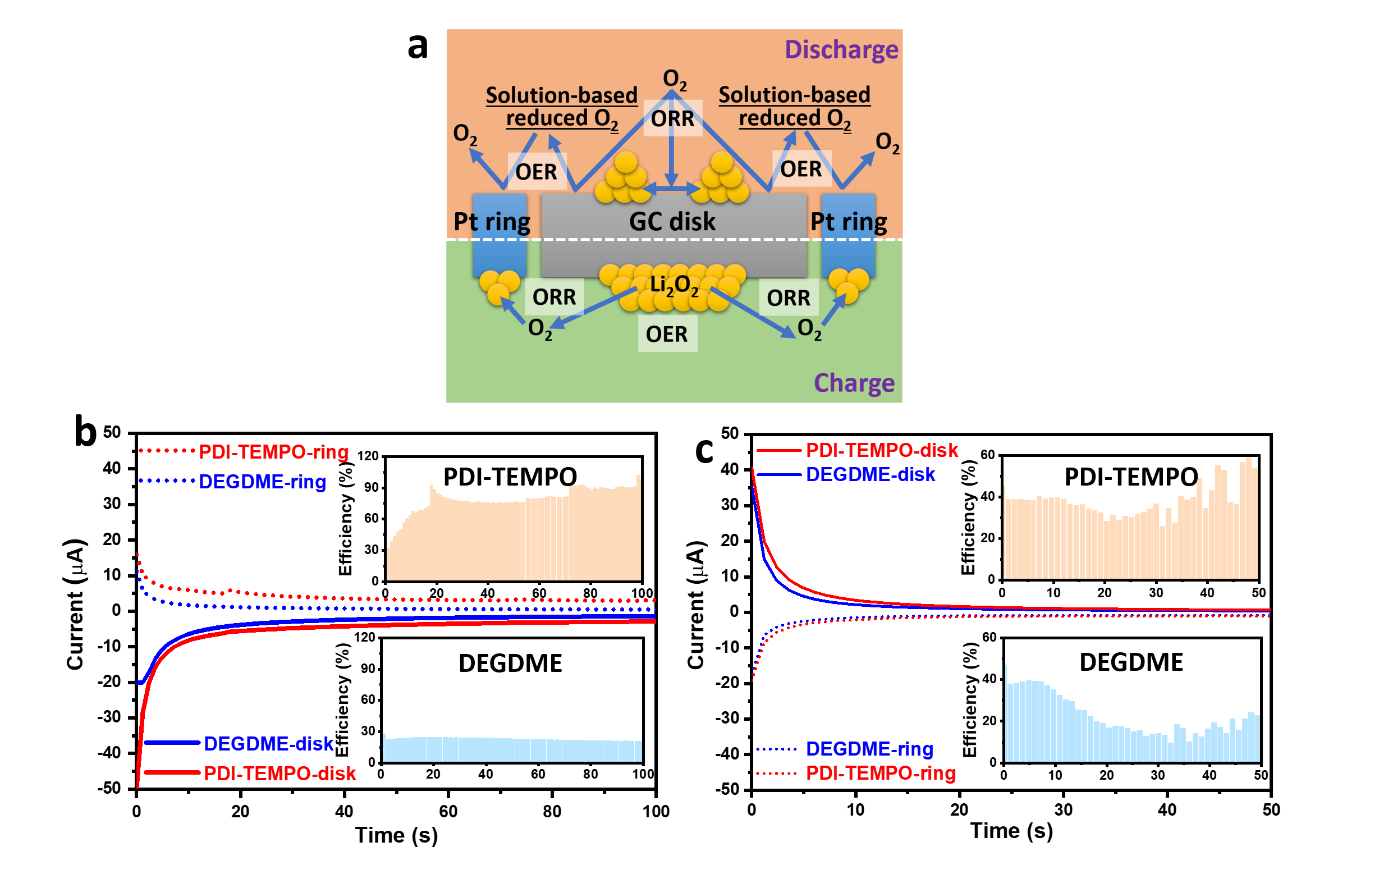


**Figure S19 |** The RRDE curves of the three-electrode cells simulated for **b.** discharge (in O2) and **c.** charge (in Ar) processes, and **a.** the schematic illustration of the reaction mechanisms**.** The reduction voltage was set to 2.3 V *vs.* Li/Li+, and the oxidation voltage was set to 4.1 V *vs.* Li/Li+. The electrolyte was prepared by dissolving 0.5 mM PDI-TEMPO in DEGDME electrolyte containing 0.5 M LiTFSI. The inset images are the efficiencies calculated by the corrected equations in Experimental session and Figure S18.

A demonstration rotating ring-disk electrode (RRDE) measurement was further conducted to reveal the nature of reactions. A home-made three-electrode cell was applied with a Pt wire as the counter electrode and a Ag wire as the reference electrode. The discharge process was simulated by applying a reduction potential to the disk electrode and an oxidation potential to the ring electrode in the oxygen atmosphere. The charge process was simulated by applying an oxidation potential to the disk electrode and a reduction potential to the ring electrode in the argon atmosphere, directly after the simulated discharge process. During the simulated discharge process, the current generated on the glassy carbon disk electrode originates from the ORR process, and the current on the Pt ring electrode is from the reduction of the solution-based reduced O2 species (Figure S19a). During the simulated charge process, the current generated on the glassy carbon disk electrode comes from the OER process by decomposing the pre-generated Li2O2, and the current on the Pt ring electrode refers to the reduction of the released O2 from OER on disk electrode (Figure S19a). As shown in Figure S19b, the current generated on disk electrode in PDI-TEMPO electrolyte was significantly higher than that in DEGDME electrolyte, revealing that the addition of PDI-TEMPO could dramatically facilitate the discharge process. As the discharge product Li2O2 is insoluble in the electrolytes, the currents gradually decreased with time due to the continuous coverage of the active surface of the disk electrode. Similarly during the simulated charge process (Figure S19c), the currents generated in the PDI-TEMPO electrolyte were higher than that in DEGDME electrolyte. The currents decreased with time due to the exhaustion of the Li2O2 accumulated during the simulated discharge process. The discharge and charge mechanisms could be estimated by calculating the Faradaic efficiency (calculation details in the Experimental section and Figure S20). As shown in the inset images in Figure S19, the calculated Faradaic efficiency in PDI-TEMPO electrolyte increase rapidly from the initial 35 % to almost 100 % during the continuous scans, while the calculated Faradaic efficiency in DEGDME electrolyte reaches 30 % initially but dropped quickly to 25 % with time. It provides direct evidence that the discharge process in PDI-TEMPO electrolyte was dominated by the solution-based mechanism, since more solution-based intermediates were generated. Furthermore, the higher Faradaic efficiency in PDI-TEMPO electrolyte during the simulated charge process is much higher and persistent than DEGDME electrolyte, indicating a high charge efficiency when PDI-TEMPO was present in the electrolyte (inset images in Figure S19c).


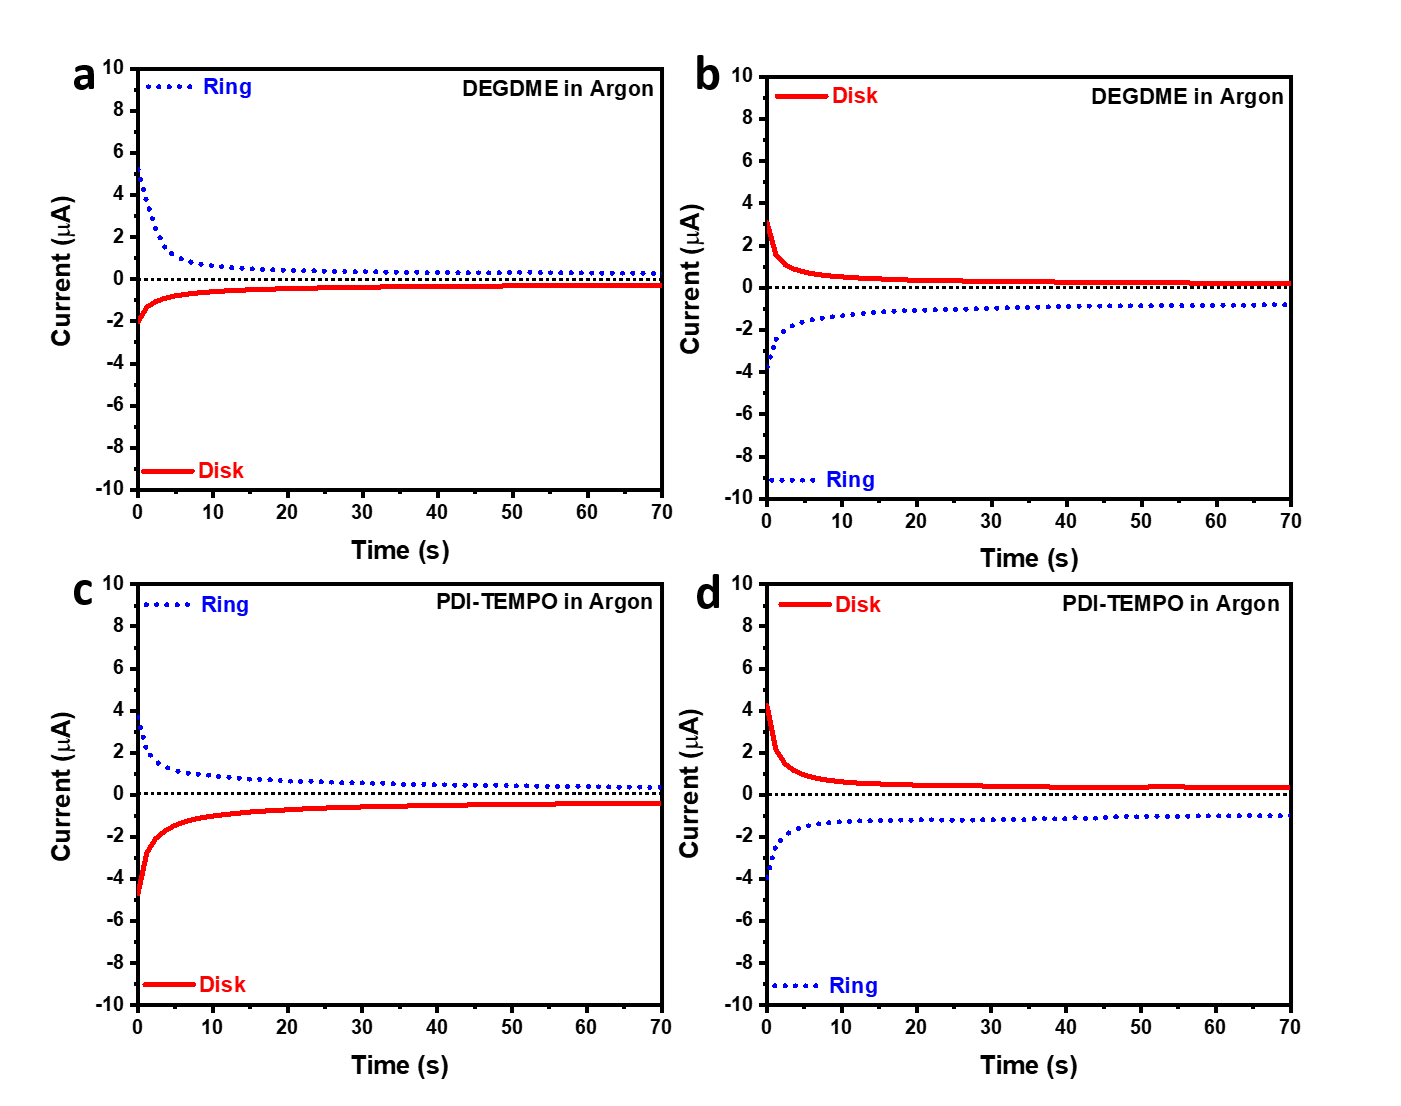


**Figure S20 | RRDE curves control experiment using of a-b. DEGDME electrolyte and c-d. PDI-TEMPO electrolyte in the argon atmosphere.** The reduction voltage was set to 2.3 V *vs.* Li/Li+, and the oxidation voltage was set to 4.1 V *vs.* Li/Li+. The electrolyte was prepared by dissolving 0.5 mM PDI-TEMPO in DEGDME electrolyte containing 0.5 M LiTFSI.

The conduct of this control experiment was performed in the argon atmosphere. Therefore, the current densities obtained on the disk and ring electrode should only originate from the side-reactions and redox reactions of PDI-TEMPO. Therefore, in order to obtain the accurate efficiency result of oxygen consumption and generation, the equation to calculate the efficiency should be corrected as follows:

The Iring and Idisk are the currents obtained on the ring and disk electrode during the ORR and OER process. The Iring-correction and Idisk-correction are the currents obtained on the ring and disk electrodes during the control experiment. In this way, the efficiencies calculated based on this corrected equation could function as indicators of the discharge and charge efficiency.

Interestingly, both currents generated on the Pt ring electrode at the reduction voltage (2.3 V *vs.* Li/Li+) were significantly higher than the ones obtained at oxidation voltage (4.1 V *vs.* Li/Li+) or those generated on the glassy carbon disk electrode. That is to say, the side reactions mainly occurred on the Pt ring electrode during the reduction scan, and under other circumstances, the side reactions were negligible.


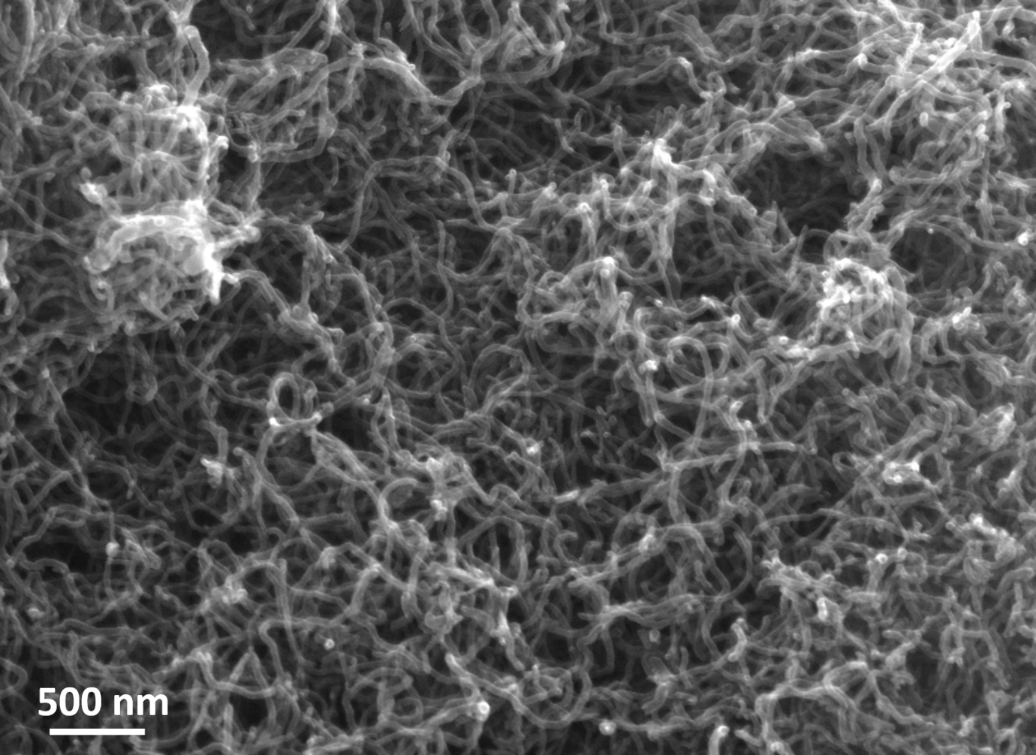


**Figure S21 | SEM image of the CNT electrode.**


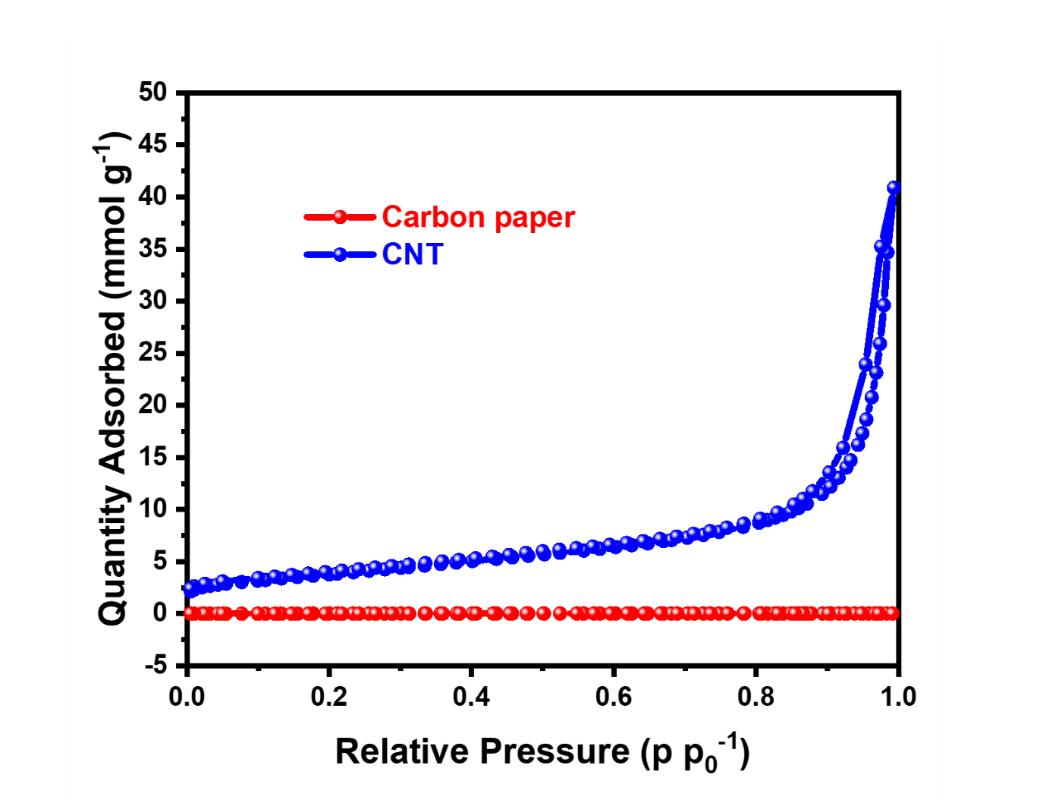


**Figure S22 | BET results of the carbon paper and CNT.**

The BET area of carbon paper is 0.984 m2 g-1 and The BET surface area of CNT is 315.12 m2 g-1. Moreover, the pore volume of CNT (0.4526 cm3 g-1) is more than 100 times of carbon paper (0.0042 cm3 g-1). Therefore, the replacement of carbon paper with CNT should generate higher discharge capacity when bare DEGDME electrolyte is used, which should provide more insight by comparing it with the PDI-TEMPO electrolyte.


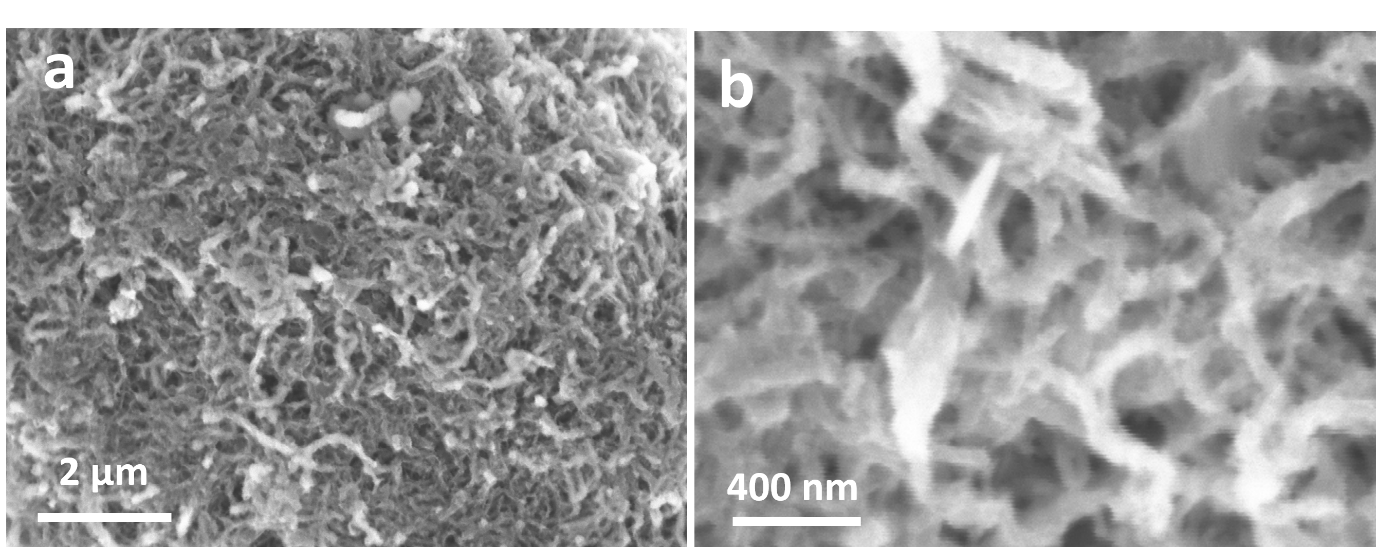


**Figure S23 | The SEM images of CNT electrode after discharge process with PDI-TEMPO electrolyte.**  **b** is the enlarged image of **a**.

The SEM image of the CNT electrode after discharge process with PDI-TEMPO electrolyte shows a large number of nanoparticles formed on CNTs instead of common toroidal-shape plates. This proves that the discharge process in PDI-TEMPO proceeds through a different mechanism from the conventional solution-mediated route. As the formed Li2O2 were in small nanoparticles, it is reasonable to assume the discharge process was dominated by chemical disproportion reaction of the superoxide radicals.


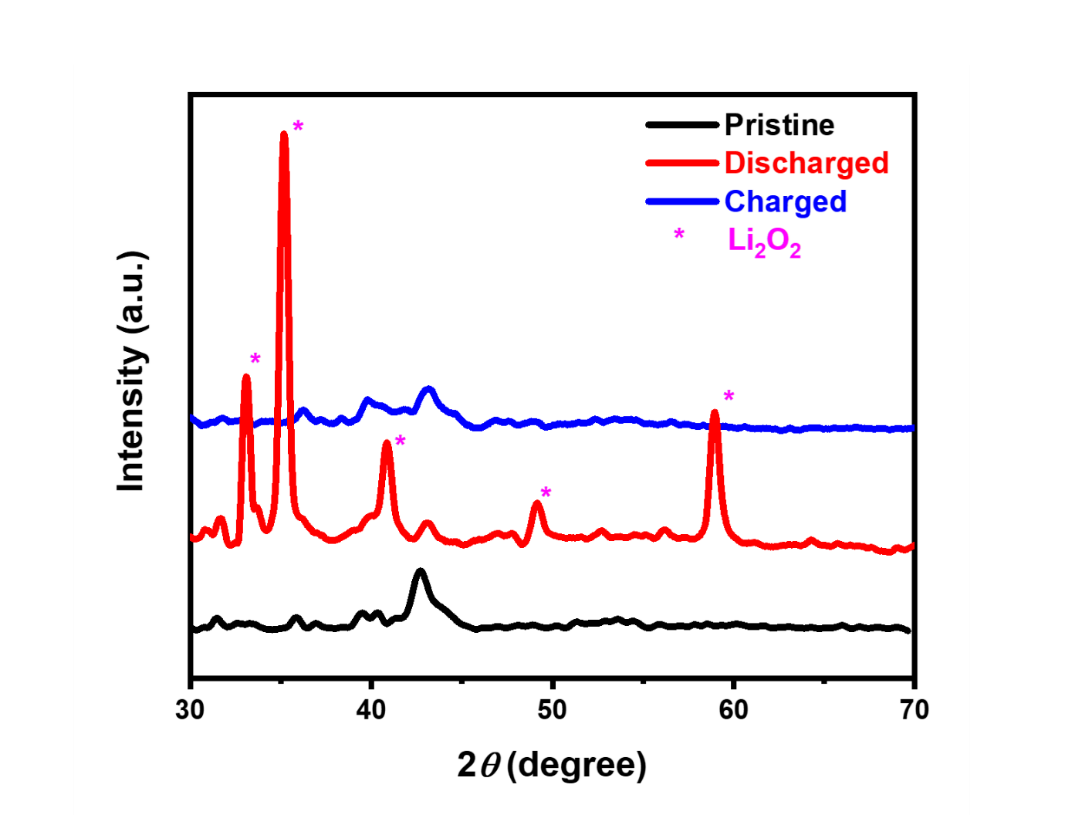


**Figure S24 | The XRD patterns of the CNT electrodes before and after the first cycle.**

The XRD pattern of the discharged electrode indicates that the discharge product was dominated by Li2O2. The peaks disappeared after the charge process, demonstrating highly reversible formation and decomposition of Li2O2 during the operation of Li-O2 batteries.


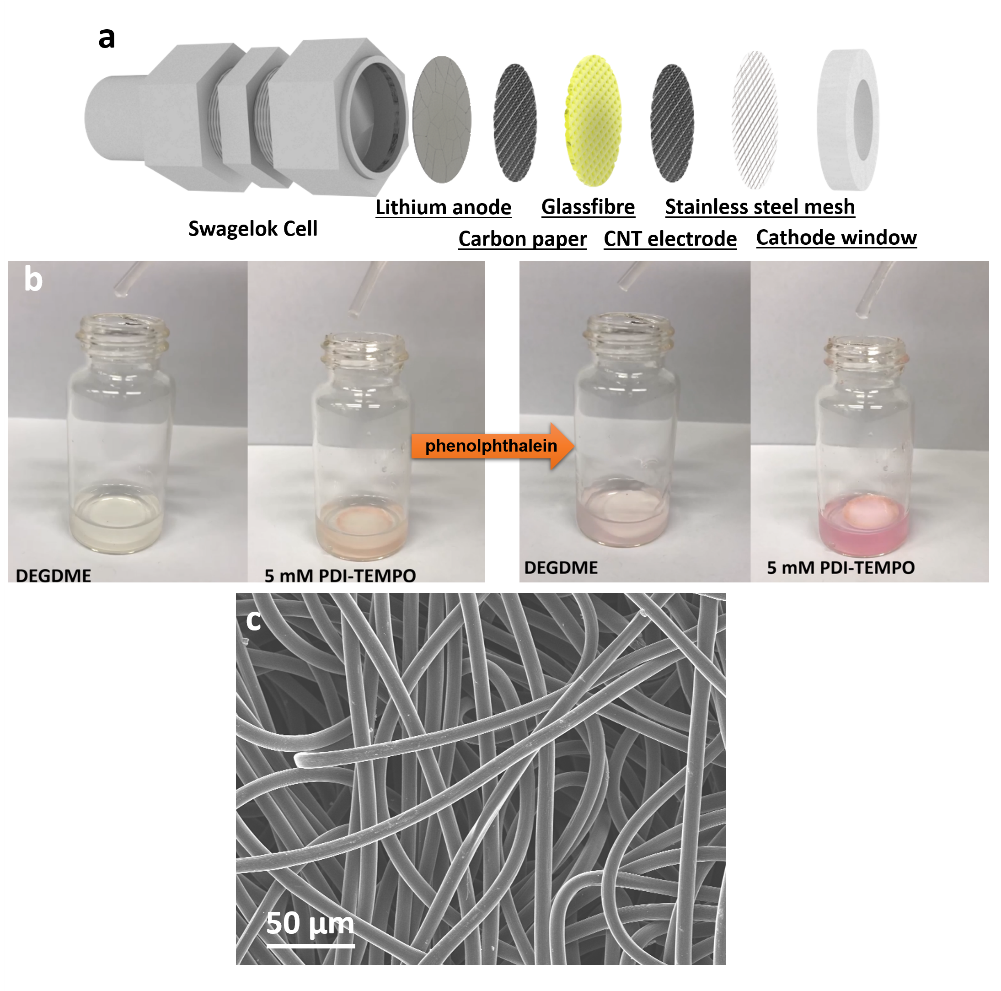


**Figure S25 | The demonstration experiment to prove that the discharge process was mainly accelerated by the chemical disproportion of superoxide radicals.**  **a.** The special cell configuration containing an additional carbon paper between the lithium anode and separator. **b.** The demonstration experiment by adding phenolphthalein into the glassfibre/aqueous electrolyte. **c.** The SEM image of the carbon paper between lithium anode and separator.

The chemical disproportion of superoxide radicals in the electrolyte led to the scattering of Li2O2 particles in the cathode and on one side of separator next to the cathode. It was confirmed by adding phenolphthalein to the solution which was prepared by soaking glassfibre in water. The scattered particles reacted to water to form an alkaline solution, which was confirmed by phenolphthalein (turning pink, Figure S25b and Supplementary Video). This proves that the particles scattered in separator were Li2O2. This demonstration experiment confirms that a small quantity of Li2O2 would be scattered into the electrolyte and deposited on the separator during the discharge process, and this should only originate from the chemical disproportion reaction of the superoxides in the electrolyte. Furthermore, there are no particles spotted on the carbon paper on the other side of the separator, indicating that the Li2O2 are mainly scattered on one side of the separator close to the cathode (Figure S25c).


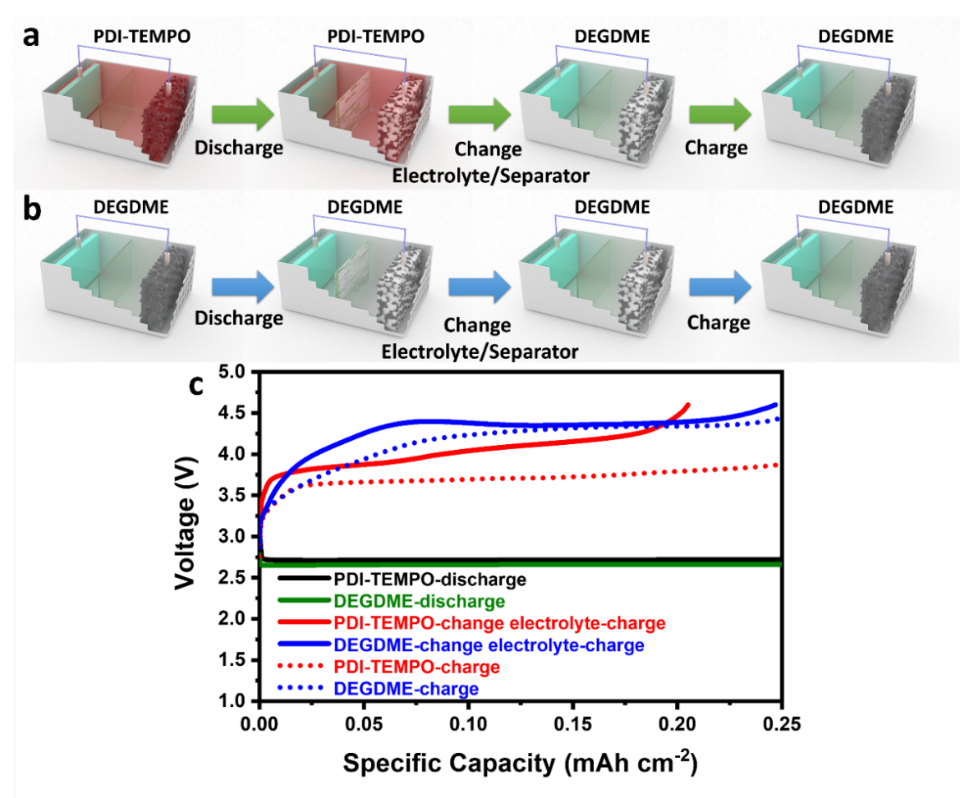


**Figure S26 | The demonstration experiment to prove the scattering of Li2O2 in the separator during the discharge process with PDI-TEMPO electrolyte.**  The schematic illustration of the changing of separator/electrolyte after discharge in **a.** PDI-TEMPO electrolyte and **b.** DEGDME electrolyte. **c.** The discharge-charge profiles of the Li-O2 cells with and without the changing of separator/electrolyte after discharge. The cells were discharged with a current density of 0.1 mA cm-2. The used separators/electrolytes were taken out and changed to the fresh separator/DEGDME electrolyte. The cells were then charged to a cut-off voltage of 4.6 V. The discharge-charge processes were also performed without the changing of separator/electrolyte.

The change of the separator/electrolyte after discharge in PDI-TEMPO electrolyte has caused the loss of about 20 % capacity fade, comparing to the DEGDME electrolyte. It indicates that a small quantity of Li2O2 was scattered to the electrolyte and separator, proving the discharge process was dominated by chemical disproportion reaction of superoxides. Furthermore, as shown in the charge curves in Figure S26, the charge over-potential of the PDI-TEMPO cell with the changed electrolyte was still lower than the one in DEGDME electrolyte, even without the effect of redox mediator. This also confirms that the small-sized particles were easier to be decomposed than the toroidal-shaped Li2O2, further demonstrating the beneficial effect with the superoxide radical quencher in the electrolyte.


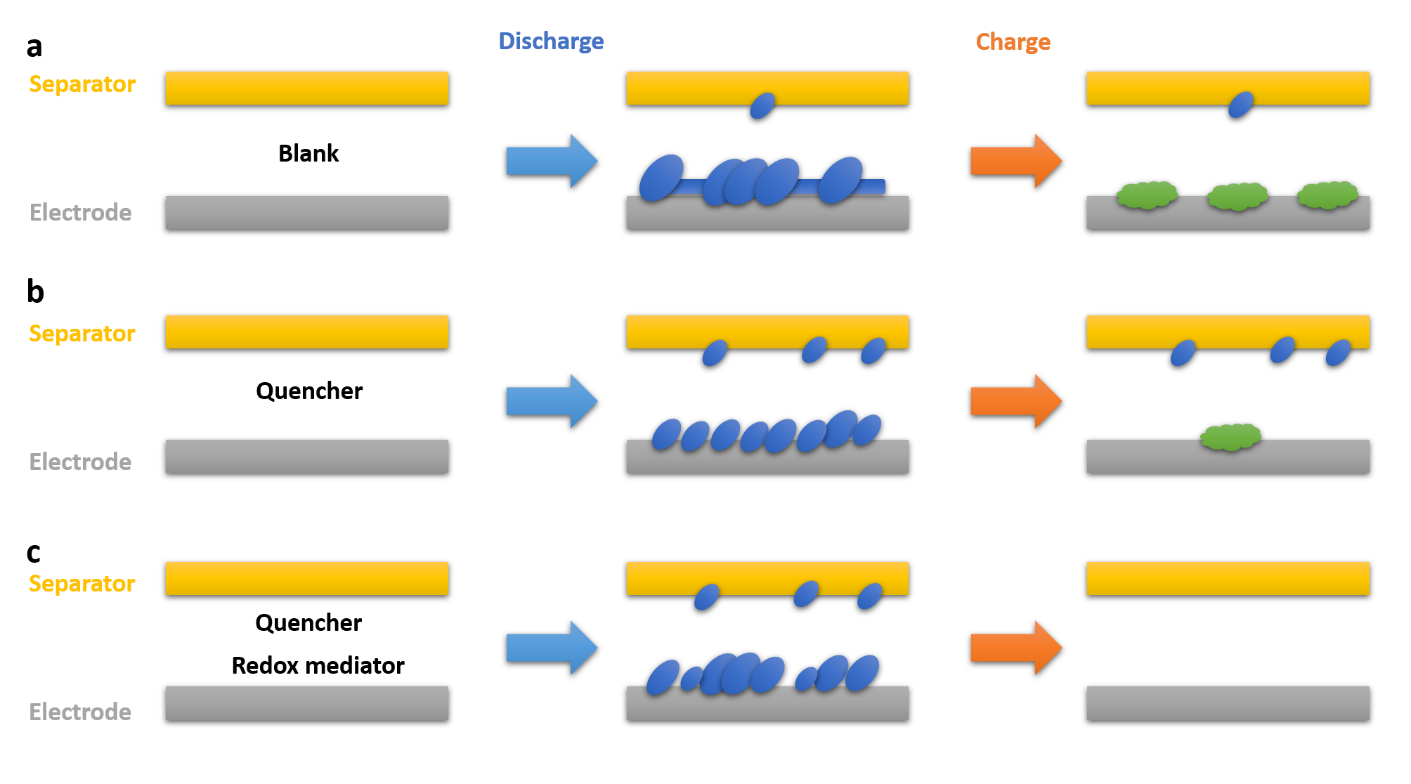


**Figure S27 | The schematic illustration of the discharge-charge processes with different additives in the electrolyte: a.** blank electrolyte, **b.** electrolyte with quencher, and **c.** electrolyte with quencher/redox mediator.

The discharge process in DEGDME electrolyte was mainly dominated by the electrochemical reaction route. Therefore, Li2O2 spotted in the bare DEGDME electrolyte can be mainly found in the cathode (Figure S27a). The addition of superoxide radical quencher in the electrolyte would result in not only the formation of small-sized Li2O2 particles, but also the scattering of Li2O2 to one side of separator close to cathode (Figure S27b). This phenomenon is beneficial to increasing the discharge capacity and may lower the charge over-potentials in the subsequent charge process. However, it also induced an additional problem that the scattered Li2O2 on the separator could not be easily decomposed as the separator was usually insulator. Therefore, this problem could be eliminated as the redox mediator could function as a mobile charge carrier, which could efficiently decompose the scattered Li2O2 on the separator (Figure S27c). Therefore, PDI-TEMPO, which combines the function of a superoxide radical quencher and a redox mediator, is ideal for the use in Li-O2 batteries with enhanced electrochemical performance.


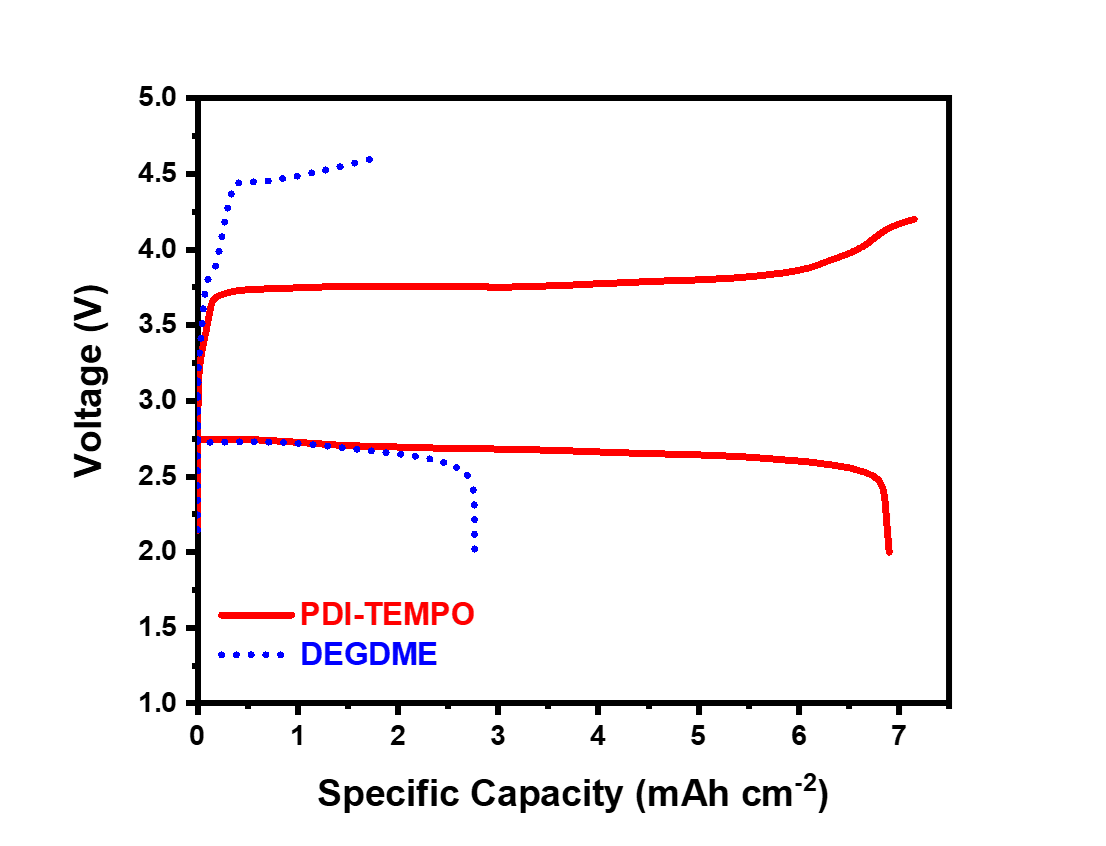


**Figure S28 | The full discharge-charge profiles of the Li-O2 cells with different electrolytes using CNT electrodes.** The current density is 0.1 mA cm-2, and the cut-off voltage is set to 2.0/4.6 V.

The addition of PDI-TEMPO in the electrolyte could efficiently enhance the capacity and lower the charge over-potentials when using CNT electrodes.


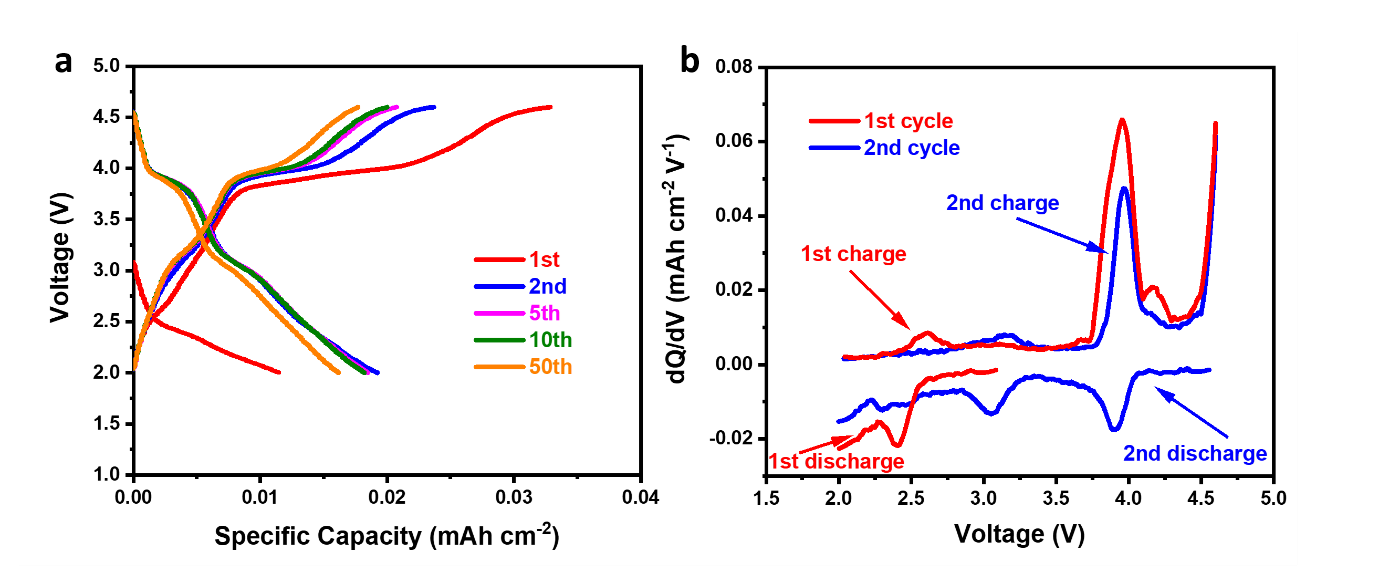


**Figure S29 | a. The discharge-charge profiles of the cells with PDI-TEMPO electrolyte in argon atmosphere using the CNT electrodes and b. the corresponding dQ/dV *vs.* V.** The current density is 0.1 mA cm-2, and the cut-off voltage is set to 2.0/4.6 V.

The reversible capacity was lower than 0.2 mAh cm-2 in the argon atmosphere, which is negligible compared to the capacity in Figure S28.


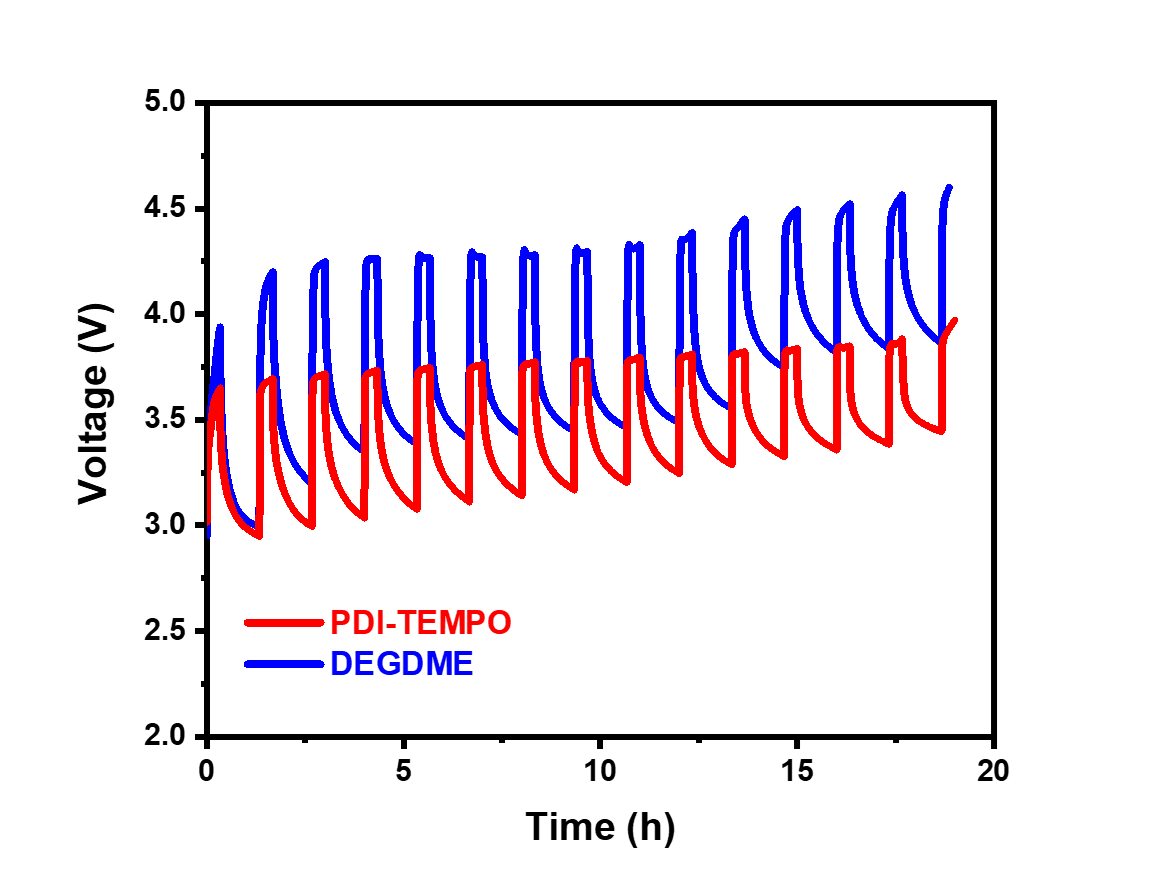


**Figure S30 | GITT curves of the Li-O2 cells, which were acquired with a current density of 0.1 mA cm-2 for 0.5 mAh cm-2 and a 60 min time interval during the discharge and charge processes.**


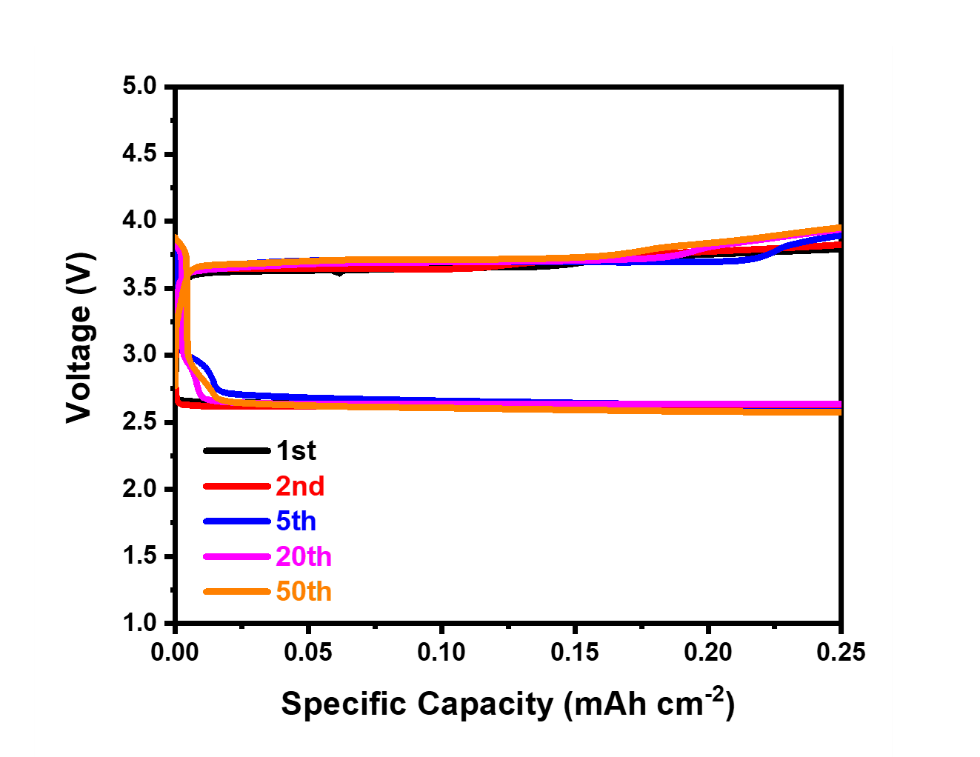


**Figure S31 | The cycling performance of the Li-O2 cells with PDI-TEMPO electrolyte using carbon paper electrodes.**

The electrochemical performance indicates that the addition of PDI-TEMPO could efficiently enhance the discharge and charge processes, and also maintain an excellent cycling performance.


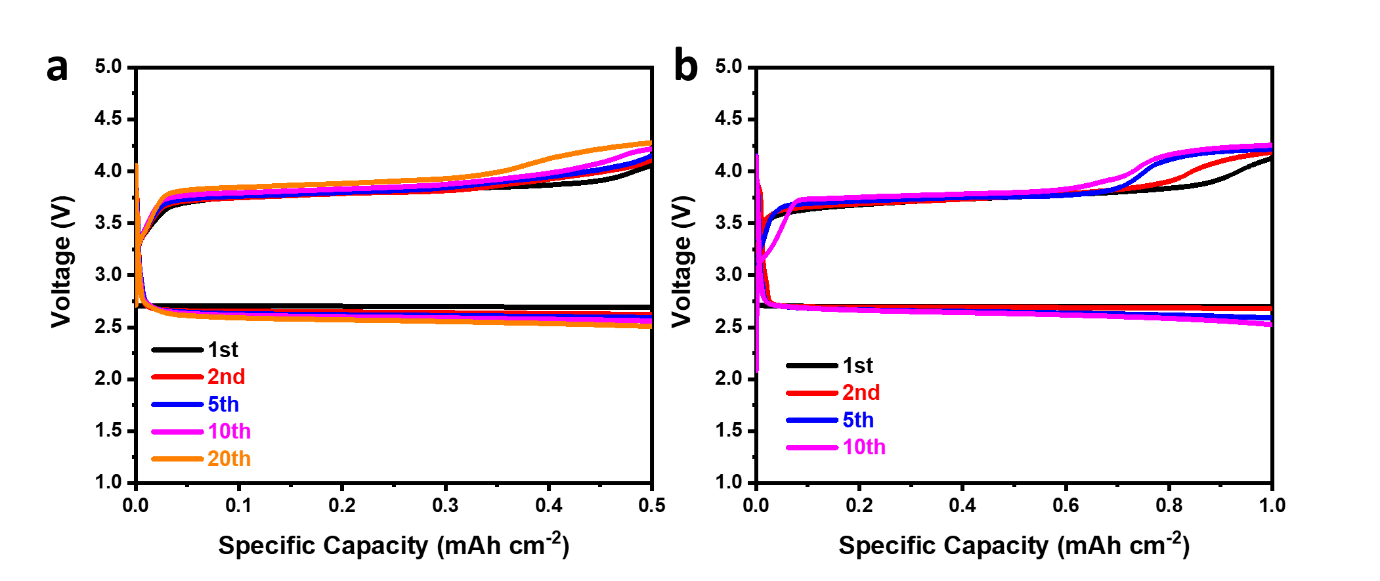


**Figure S32 | The discharge-charge profiles of Li-O2 cells with PDI-TEMPO electrolyte using CNT electrodes at different cut-off capacity: a.** 0.5 mAh cm-2, and **b.** 1 mAh cm-2.The current density is 0.1 mA cm-2.

The Li-O2 batteries could still maintain good cycling performance when the reversible cut-off capacities were extended to 0.5 mAh cm-2 and 1 mAh cm-2.


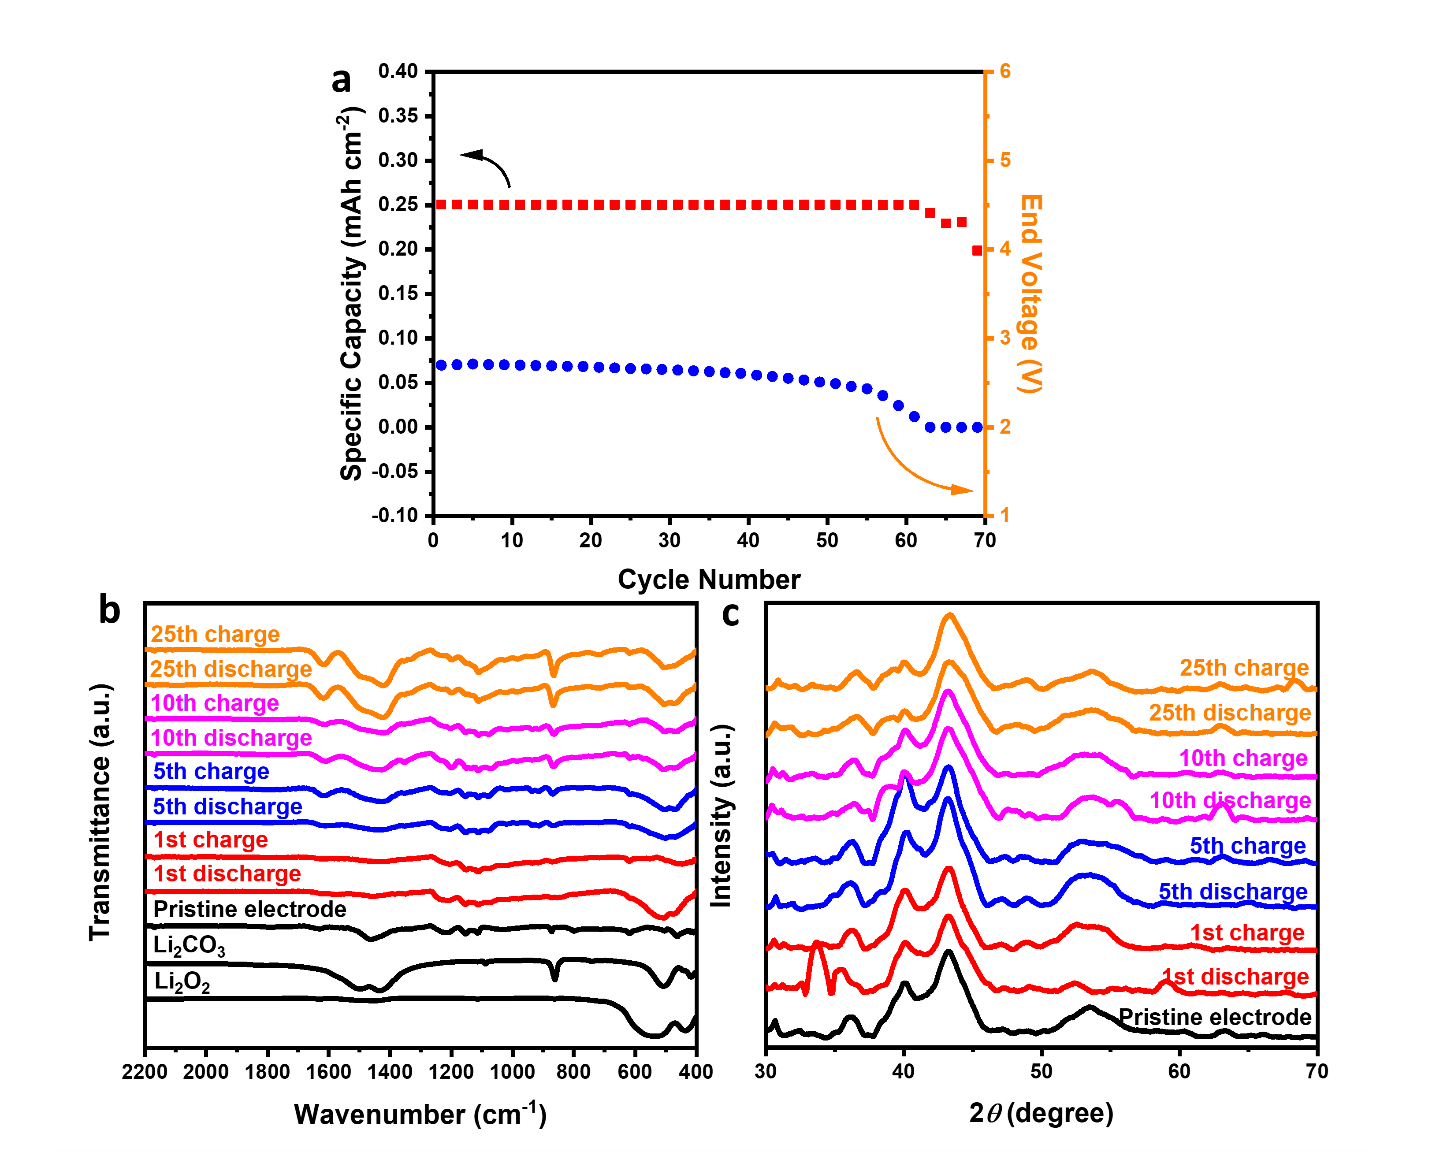


**Figure S33 | The post-mortem characterization of Li-O2 batteries with TEMPO electrolyte after cycles: a.** The cycling performance of the Li-O2 cell with TEMPO electrolyte. **a.** FTIR spectra and **b.** XRD patterns of the electrodes after cycles. The TEMPO electrolyte was prepared by dissolving 10 mM TEMPO in the DEGDME electrolyte with 0.5 M LiTFSI.

The cycle life of the Li-O2 cell was prolonged with TEMPO electrolyte, comparing to the bare DEGDME electrolyte. This is owing to the remarkable capability of TEMPO as a redox mediator to lower the charge over-potentials, which efficiently suppresses parasitic reactions associated with the decomposition of electrolyte solvents at high charge voltage. However, the cell still only last for 60 cycles, which is signifincatly shorter than the one with PDI-TEMPO electrolyte (Figure 4b). This is due to the additional capability of PDI-TEMPO as a superoxide radical quencher to quench superoxide radicals.


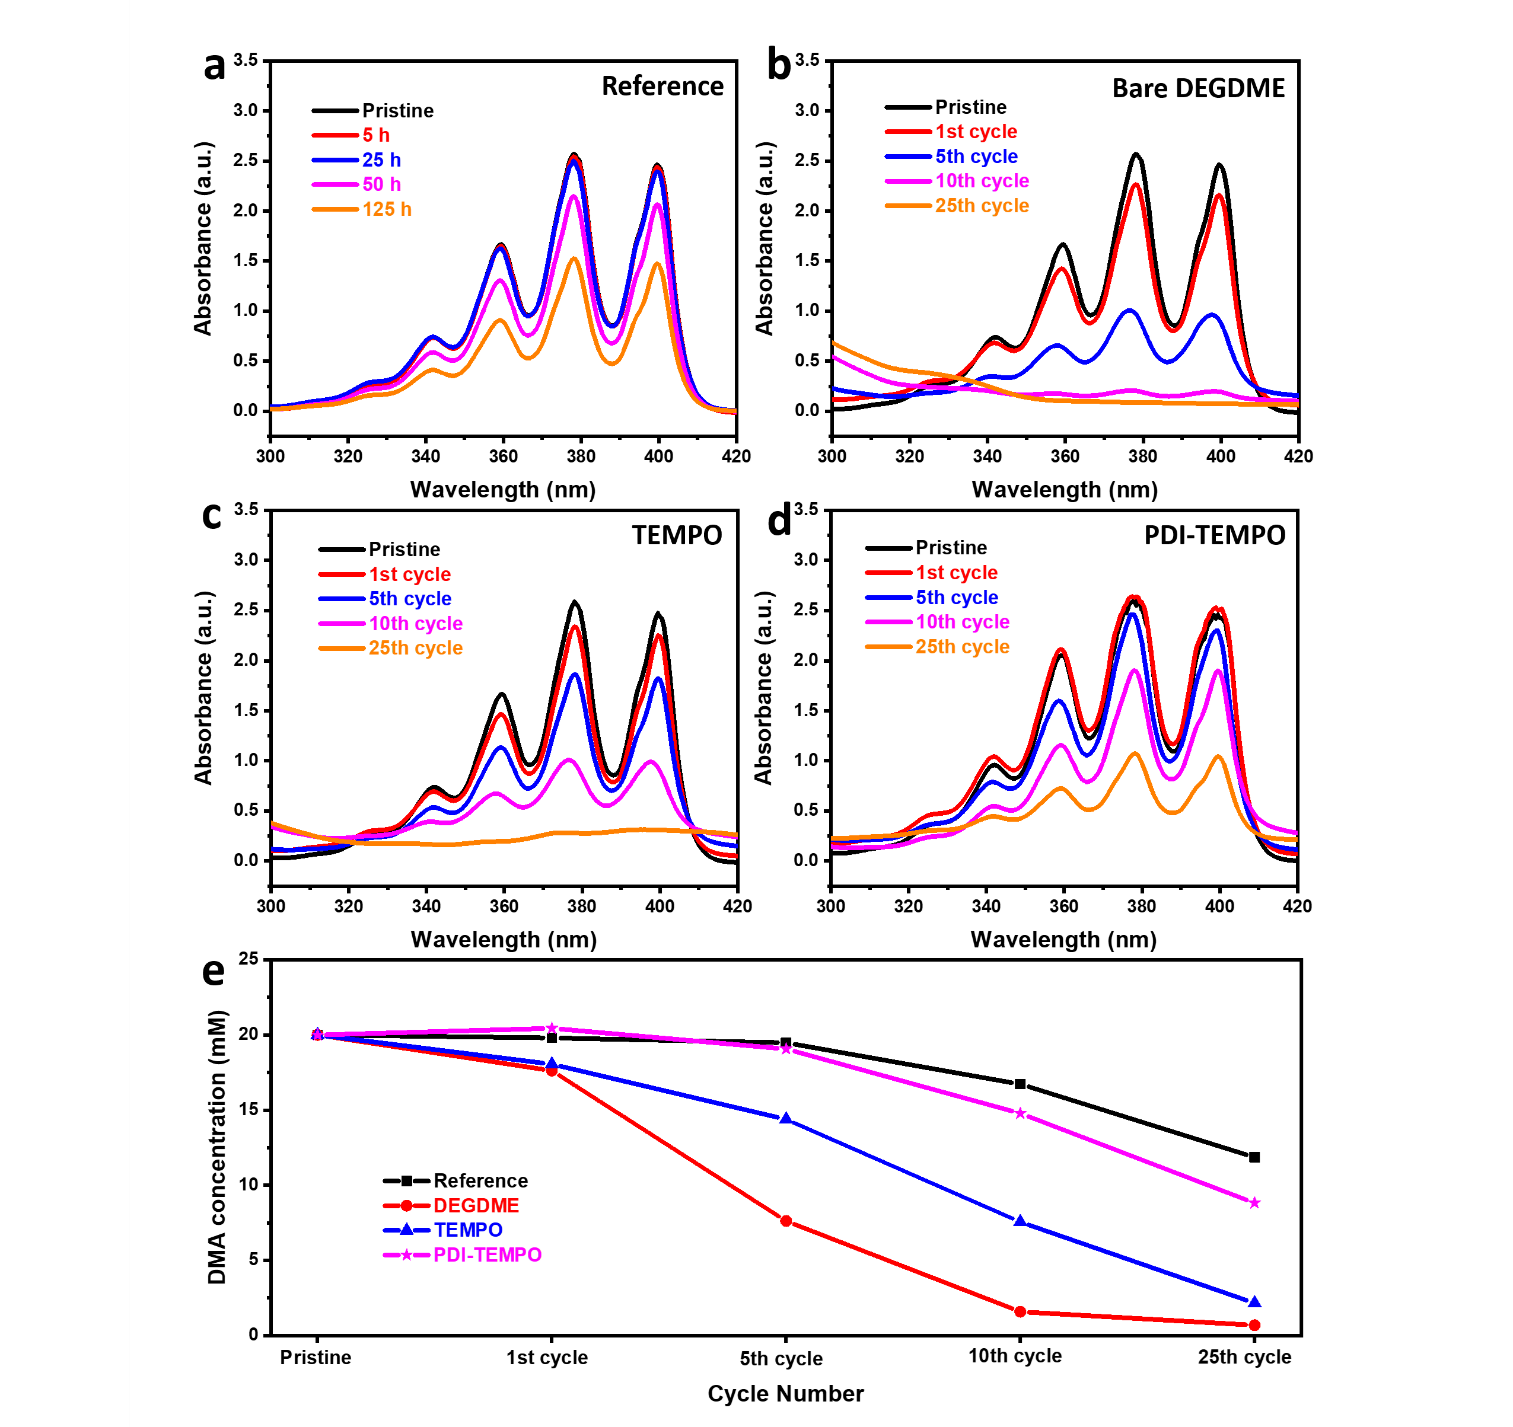


**Figure S34 | Demonstration experiment with 20 mM DMA as the indicator on the suppression effect of singlet oxygen during long-term cycling. a**-**d.** The UV spectra of **a.** reference and diluted electrolytes retrieved from cells with **b.** DEGDME electrolyte, **c.** 5 mM TEMPO electrolyte, and **d.** 5 mM PDI-TEMPO electrolyte. The reference is 20 mM DMA in DEGDME electrolyte, which rests for a certain time equaling to each cycling period. **e.** The calculated DMA concentration remained in the electrolyte based on the absorbance intensity of peaks at 378 nm. All cells were cycled at a current density of 0.1 mA cm-2 with the capacity limitation of 0.25 mAh cm-2.

20 mM DMA was dissolved in all three electrolytes includes bare DEGDME, 5 mM TEMPO and 5 mM PDI-TEMPO electrolytes.14-16 LiFePO4/C electrodes are used instead of lithium metal anodes to prevent possible reactions between DMA and lithium metal. The Li-O2 cells with these electrolytes were operated for certain cycles, and all the components retrieved from cells were dissolved in 9 mL pure DEGDME solvent for ultraviolet (UV) tests. A reference was also prepared by resting the bare DEGDME electrolyte with 20 mM DMA under oxygen for the same time of each cycle period to exclude the possible self-degradation of DMA (Figure S34a and S34e). As shown in Figure S34b and S34e, the DMA concentration in the bare DEGDME electrolyte shows a sharp drop after each cycle period, indicating a significant amount of singlet oxygen is generated during the operation of Li-O2 batteries. The consumption of DMA in TEMPO electrolyte is much slower than that in the bare DEGDME electrolyte, verifying that the TEMPO can suppress the generation of singlet oxygen owing to its excellent capability in lowing the charge over-potential, and accelerates the relaxation of singlet-state intermediate to triplet-state (Figure S34c and S34e). Nevertheless, the DMA in TEMPO electrolyte is exhausted before 25 cycles, indicating that singlet oxygen is still generated by parasitic reactions during cycling. Unlike these two electrolytes, the DMA in PDI-TEMPO is consumed much slower, which almost equals the DMA self-degradation rate in oxygen and light (Figure S34a, S34d and S34e). This result clearly demonstrates that PDI-TEMPO molecules can efficiently suppress the generation of singlet oxygen, by eliminating the origins of singlet oxygen such as quenching superoxide radicals and lowering the charge over-potential, and deactivate singlet oxygen.


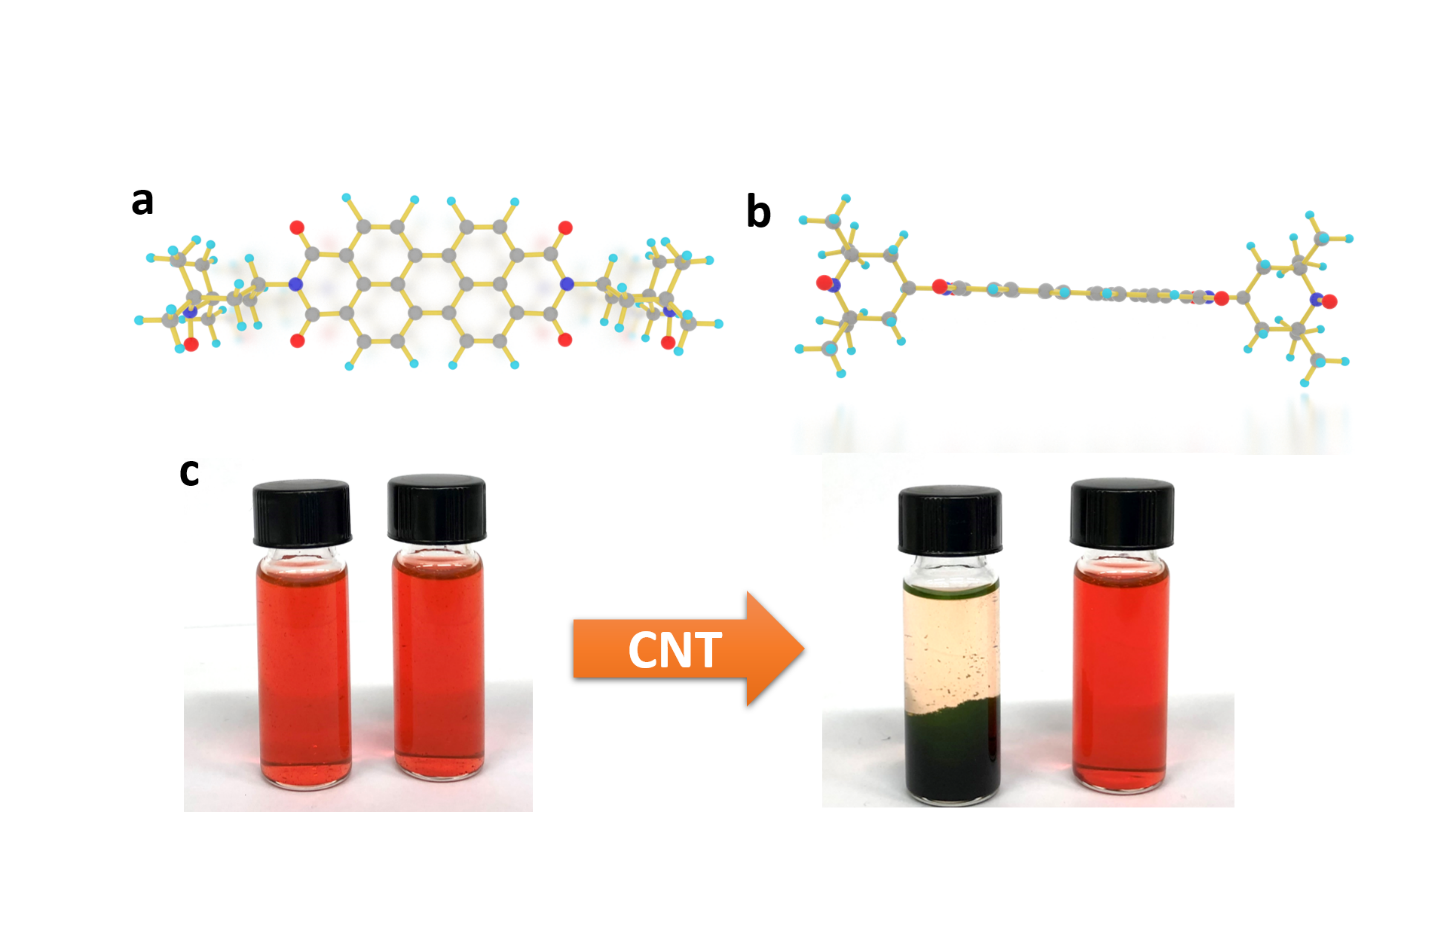


**Figure S35 | The interactions between PDI-TEMPO and CNT electrode. a.** The topview and **b.** sideview of the stereostructure of PDI-TEMPO. **c.** The demonstration experiment by adding CNT in the PDI-TEMPO electrolyte.

The structure of the PDI-TEMPO consists of a conjugated PDI backbone and two TEMPO side functional groups. As shown in Figure S35a-b, the stereostructure of the TEMPO groups was not in the same plane with the PDI core structure. Instead, they are distributed in a vertical manner, due to the steric hindrance between C=O group from PDI and CH2 group from TEMPO. As a result, the conjugated PDI structure could be easily attracted to the surface of the conjugated graphitic carbon by π-π interactions, while the vertical TEMPO groups could efficiently prevent them from getting too close to the carbon surface to form strong stacking structure. This type of interaction is very critical, as the attraction between PDI and carbon partially restrict the movement of PDI-TEMPO molecules to the cathode side, and the repulsion between TEMPO and carbon could prevent the deposition of PDI-TEMPO molecules to the surface of carbon. A further demonstration experiment was conducted by adding CNT into the PDI-TEMPO electrolyte. It appears that the PDI-TEMPO molecules were drawn to the surface of CNT, leaving the electrolyte with faded colour. It proves that the PDI-TEMPO molecules are restricted to move around the CNT cathode.


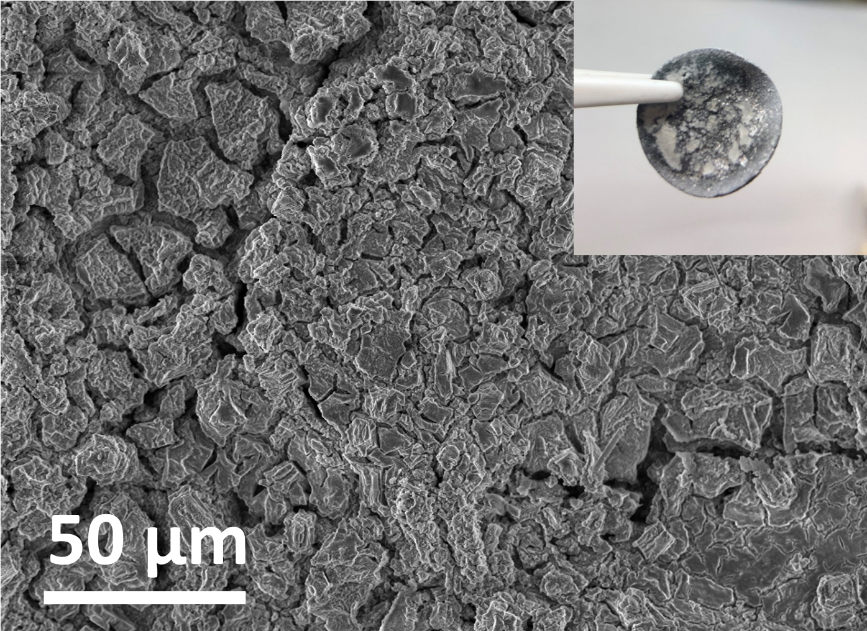


**Figure S36 | SEM image of the lithium metal anode from TEMPO electrolyte after 10 cycles.** The inset image is the digital photo of the lithium metal anode.


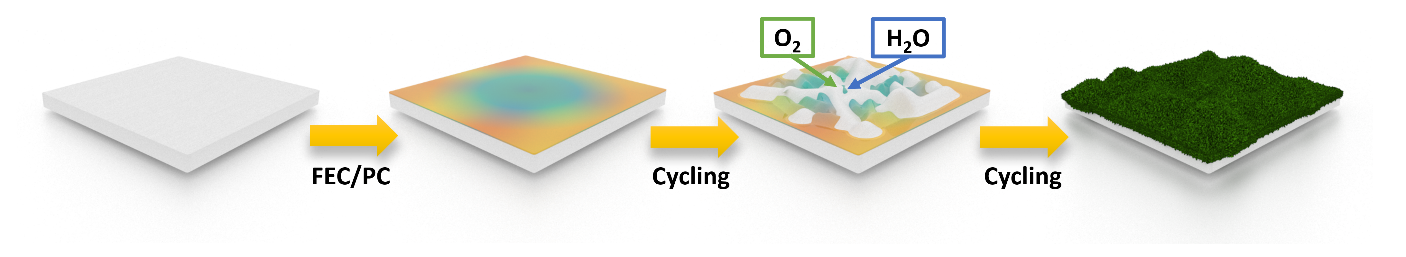


**Figure S37 | The schematic illustration of the corrosion mechanism of lithium metal anode in bare DEGDME electrolyte.**


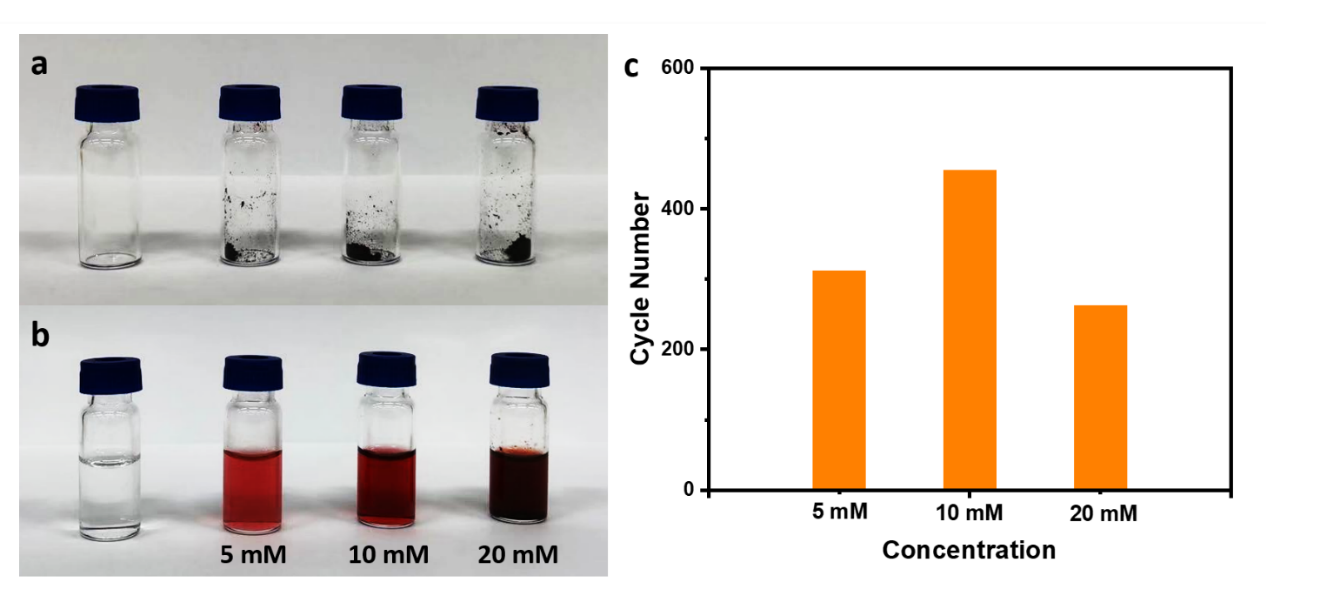


**Figure S38 | Solubility tests and corresponding cycling performance of Li-O2 batteries. a-b.** The digital photo of the electrolyte a. before and b. after the addition of DEGDME solvent. **c.** The cycling performance of Li-O2 batteries using electrolytes with different PDI-TEMPO concentrations. All cells were cycled at 0.2 mA cm-2 with the capacity limitation of 0.25 mAh cm-2.

The cell with 10 mM PDI-TEMPO electrolyte achieves the best cycle performance, and the cell with 20 mM electrolyte surprisingly displays fewer cycle numbers than that with 5 mM PDI-TEMPO. This is probably because the high PDI-TEMPO concentration increases the viscosity of the electrolyte, leading to relatively low transport of oxygen and ions. Furthermore, the high concentration of PDI-TEMPO may exceed the capability of graphitic carbon to attract PDI-TEMPO molecules to the cathode, which results in the migration of active molecules to the lithium anode surface. This induces parasitic reactions, which deteriorates the performance of the Li-O2 cell. Therefore, the optimized concentration of PDI-TEMPO in DEGDME solvent is 10 mM.


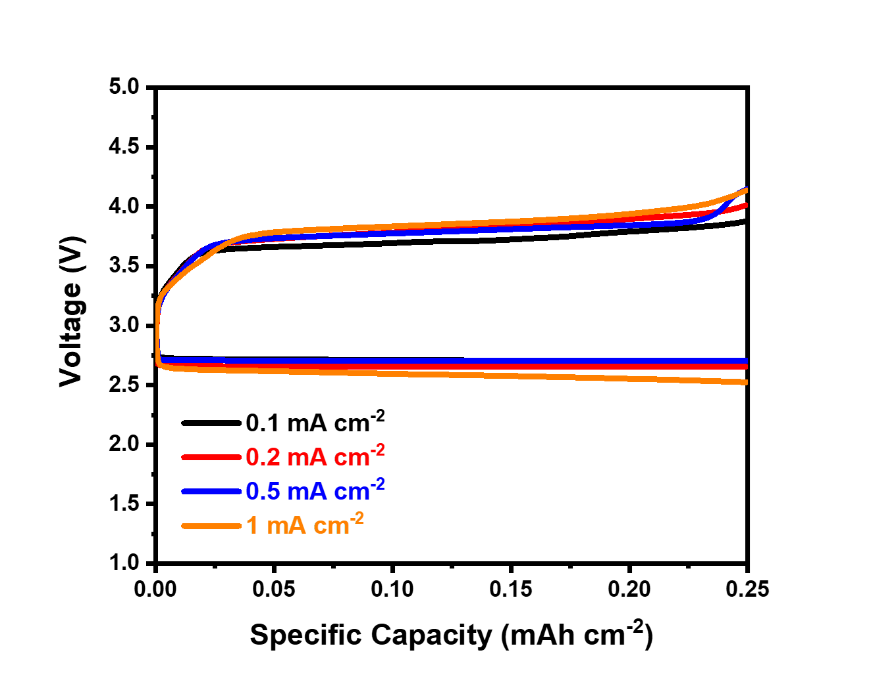


**Figure S39 | Rate capability with PDI-TEMPO electrolyte.** The electrolyte was prepared by dissolving 10 mM PDI-TEMPO in DEGDME electrolyte with 0.5 M LiTFSI.


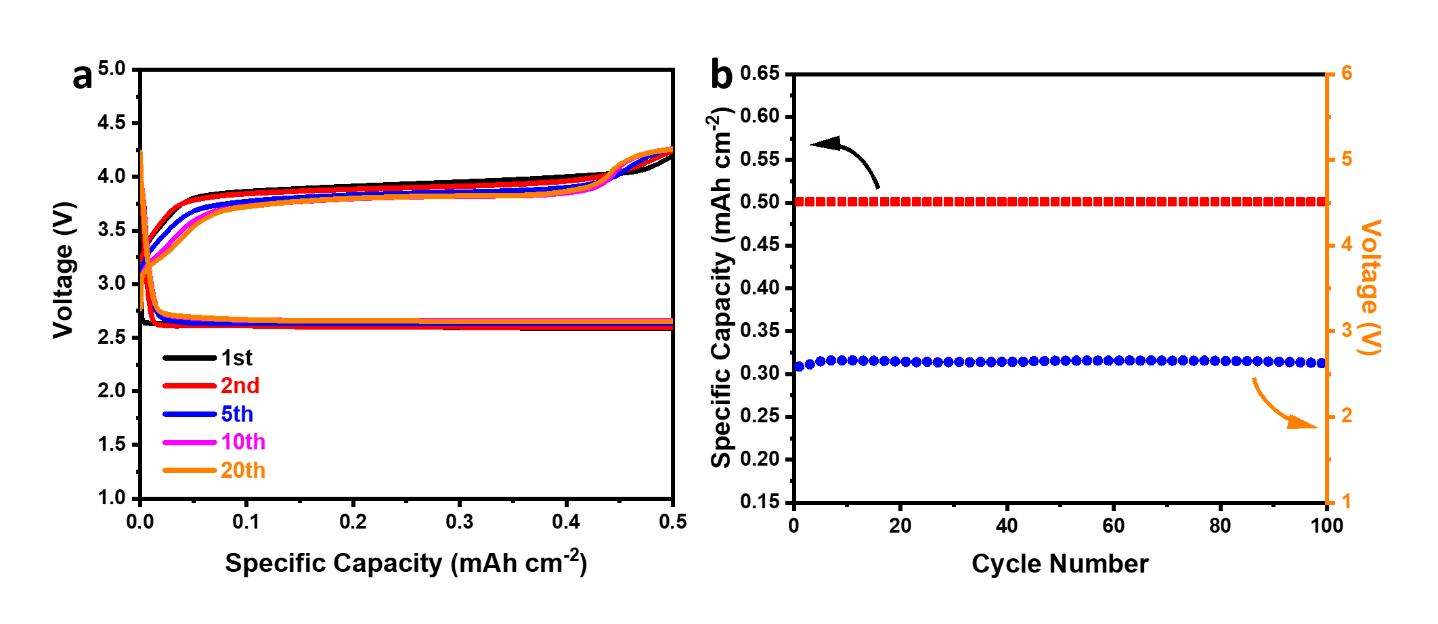


**Figure S40 | a.** **The discharge-charge profiles and b. cycling performance of the Li-O2 batteries with 10 mM PDI-TEMPO electrolyte at a curtailing capacity of 0.5 mAh cm-2.** The current density is 0.2 mA cm-2.


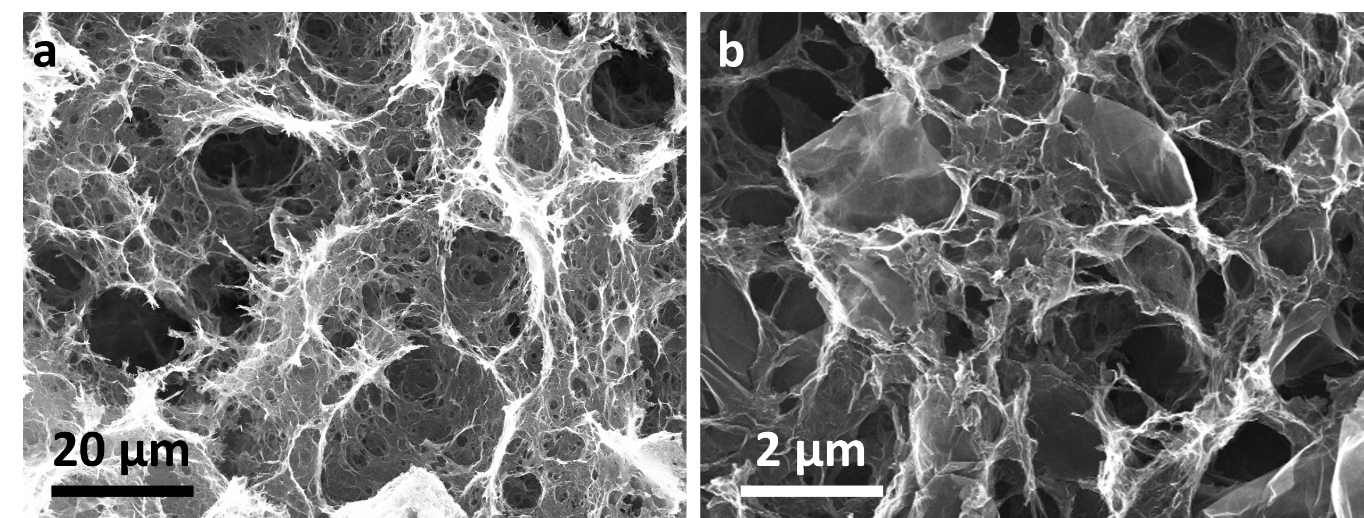


**Figure S41 | The SEM images of porous graphene at a. low and b. high magnifications**.


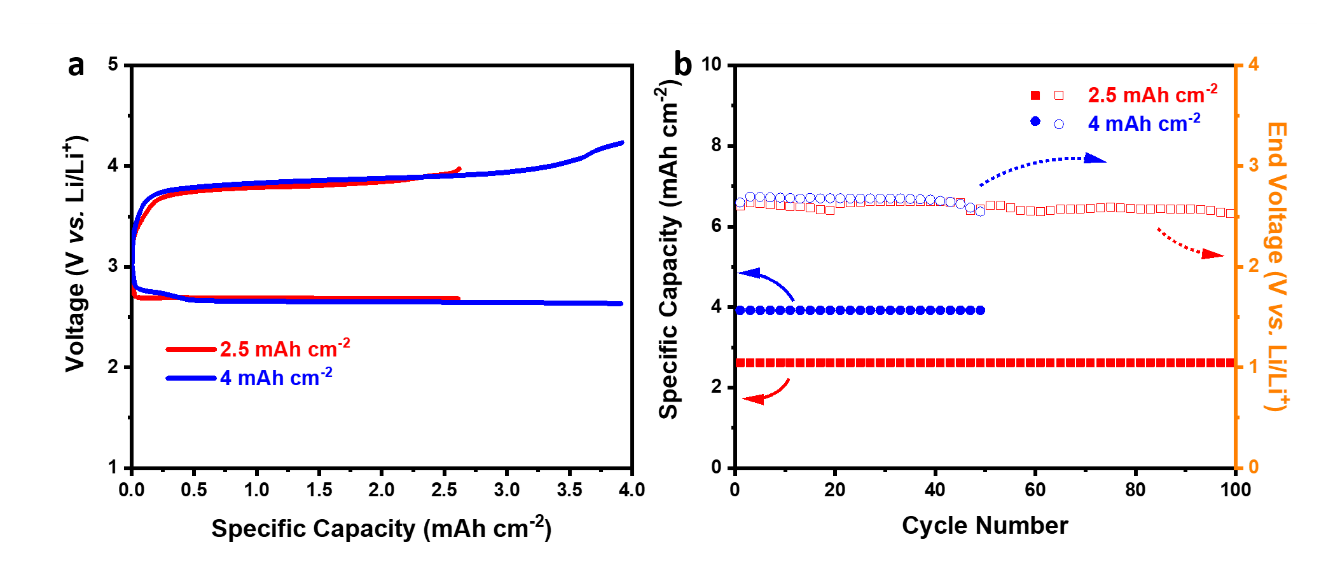


**Figure S42 | The electrochemical performance of Li-O2 battery with 10 mM PDI-TEMPO electrolyte using PGE at high curtailing areal capacities. a.** Discharge and charge curves, and **b.** the cycling performance of Li-O2 batteries with different curtailing capacities. The current density was 0.2 mA cm-2 for 2.5 mAh cm-2 and 0.5 mA cm-2 for 4 mAh cm-2.


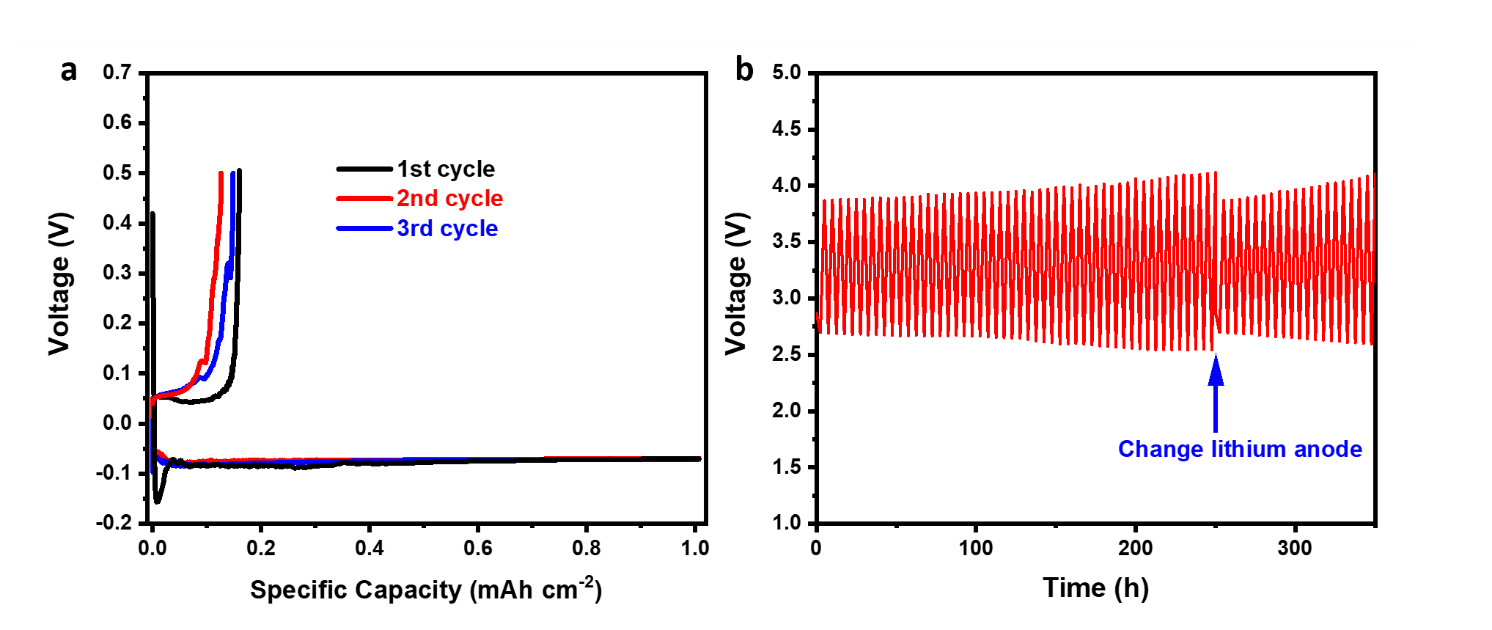


**Figure S43 | The demonstration experiments of lithium metal anode in Li-O2 batteries. a.** The discharge and charge profiles of a Li | Cu half cell. The current density is 1 mA cm-2. **b.** The electrochemical performance of Li-O2 batteries before and after the change of fresh lithium metal anode. The current density was 0.1 mA cm-2.

Although the unique stereostructure of PDI-TEMPO can efficiently restrict the movement of PDI-TEMPO molecules around the cathode, the parasitic reactions between lithium metal and ether-based electrolyte (forming lithium dendrites, dead lithium, and solid electrolyte interfaces) can still lead to the poor cycling performance of lithium metal anode. To test the cycling stability and Coulombic efficiencies of lithium metal in the bare DEGDME electrolyte, we assembled a Li | Cu half cell using copper foil as the working electrode and bare lithium foil as the counter electrode. Lithium metal was first plated on Cu current collector with a fixed capacity of 1 mAh cm-2 and then stripped to 0.5 V at the current density of 1 mA cm-2. As shown in Figure S43a, the half cell shows very low Coulombic efficiencies (<20%). Additional experiment was conducted by replacing the lithium anode after 50 cycles with a fresh lithium metal foil. As shown in Figure S43b, the over-potential of the Li-O2 cell gradually increases during long-term cycling (250 h). The change of lithium metal anode can efficiently reduce the over-potential of the Li-O2 cell, verifying that the cathode and electrolyte are still active after long-term cycling.


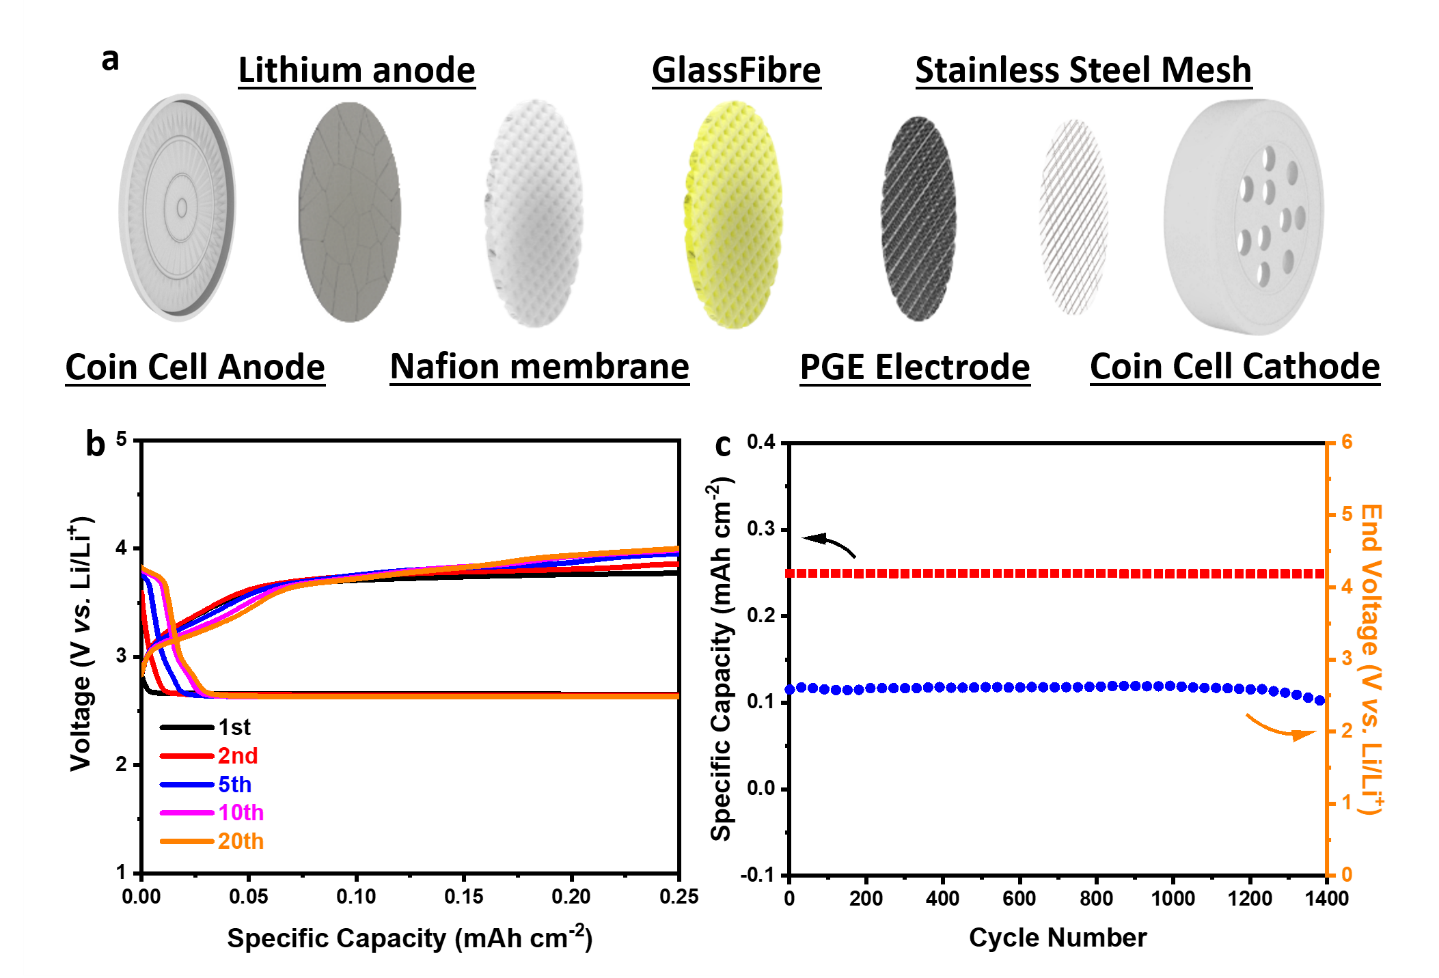


**Figure S44 | The long-term cycling profile of Li-O2 battery with 10 mM PDI-TEMPO electrolyte with PGE and Nafion membrane in the coin cell. a.** The schematic illustration of the coin cell composition. **b.** Discharge and charge curves of the Li-O2 battery and **c.** the corresponding cycling performance. The current density was 0.5 mA cm-2.

**Table S1** **| Comparison of common redox mediators used in Li-O2 batteries**

| Additives | Additional efforts | Calculated reversible capacity* | Accumulated capacity#  mAh | Cycling number | Reference |
| --- | --- | --- | --- | --- | --- |
| PDI-TEMPO | **N/A** | **0.2 mAh** | **90** | **450** | **This work** |
| PDI-TEMPO | **Porous graphene** | **2/3.2 mAh** | **200/160** | **100/50** | **This work** |
| PDI-TEMPO | **Nafion membrane/Porous graphene/Coin cell** | **0.1 mAh** | **140** | **1400** | **This work** |
| IL-TEMPO | **N/A** | **0.2 mAh** | **40** | **200** | **Nat. Common. 10, 602 (2019)** |
| TTF | **MoF separator** | **0.24-0.33 mAh** | **29-40** | **120** | **ACS Energy Lett. 3, 463 (2018)** |
| TTF | **Porous graphene** | **0.03-0.3 mAh** | **3-30** | **100** | **Adv. Energy Mater. 7, 1601933 (2017)** |
| TTF | **Porous gold+LiFePO4** | ***300 mAh/ggold** | **N/A** | **100** | **Nat. Chem. 5, 489 (2013)** |
| TTF | **LiCl+Porous graphene** | **0.785 mAh** | **78.5** | **100** | **Angew. Chem. Int. Ed. 56, 8505 (2017)** |
| LiI | **Polypyrrole** | **0.23 mAh** | **4** | **17** | **APL Mater. 6, 047704 (2018)** |
| LiI | **N/A** | **0.5 mAh** | **15** | **30** | **J. Phys. Chem. C 122, 1522 (2018)** |
| LiI | **N/A** | **0.0016 mAh** | **0.16** | **100** | **J. Mater. Chem. A 3, 8855 (2015)** |
| LiI | **Carbon nanotube array** | **0.012/0.036 mAh** | **11** | **900/300** | **Angew. Chem. 126, 4007 (2014)** |
| LiI | **photoelectrode** | **0.6 mAh** | **15** | **25** | **Nat. Commun. 5, 5111 (2014)** |
| LiI | **Gel polymer electrolyte** | **0.096-0.12 mAh** | **38-48** | **400** | **Angew. Chem. Int. Ed. 56, 7505 (2017)** |
| LiI(HPN)2 | **lithiated Nafion**  **membrane** | **0.2 mAh** | **4** | **20** | **J. Phys. Chem. Lett. 8, 4218 (2017)** |
| KI | **N/A** | ***0.5 mAh cm-2** | **N/A** | **23** | **J. Phys. Chem. C 121, 3822 (2017)** |
| CsI | **PEDOT:PSS** | **~0.45 mAh** | **59** | **129** | **ACS Appli. Mater. Inter. 8, 8561 (2016)** |
| InI3 | **N/A** | **0.19 mAh** | **10** | **50** | **Energy Environ. Sci. 9, 1024 (2016)** |
| LiBr | **N/A** | ***0.5 mAh cm-2** | **N/A** | **40** | **Energy Environ. Sci. 9, 2334 (2016)** |
| LiBr | **Solid-state Li-conducting glass-ceramic** | ***0.4 mAh cm-2** | **N/A** | **15** | **J. Am. Chem. Soc. 138, 7574 (2016)** |
| LiNO3 | **Bacterial cellulose hydrogel** | ***500 mAh g-1** | **N/A** | **60** | **Carbon 118, 114 (2017)** |
| LiNO3 | **N/A** | **0.39 mAh** | **20** | **50** | **RSC Adv. 4, 11115 (2014)** |
| TEMPO | **N/A** | ***0.35 mAh cm-2** | **N/A** | **10** | **ACS Appli. Mater. Inter. 8, 7756 (2016)** |
| TEMPO | **N/A** | ***0.15-0.25 mAh cm-2** | **N/A** | **50** | **J. Am. Chem. Soc. 136, 15054 (2014)** |
| TEMPO | **Composite protective layer** | **0.9 mAh** | **54** | **60** | **Adv. Mater. 28, 857 (2016)** |
| MPT | **LiFePO4** | **0.11-0.15 mAh** | **5-8** | **50** | **ACS Appli. Mater. Inter. 9, 3733 (2017)** |
| MPT | **LiNO3** | **0.4 mAh** | **48** | **120** | **J. Mater. Chem. A 5, 10609 (2017)** |
| TMPPA  DTBBQ | **Flow cell** | **6 mAh** | **18** | **3** | **ACS Catal. 6, 6191 (2016)** |
| TDPA | **N/A** | **0.2-0.3 mAh** | **20-30** | **100** | **ACS Cent. Sci. 1, 510 (2015)** |
| Viologen  LiI | **Redox flow cell** | **2 mAh** | **60** | **30** | **Chem. Commun. 51, 9451 (2015)** |
| 1-Me-AZADO | **N/A** | **0.314-0.628 mAh** | **2-5** | **8** | **Phys. Chem. Chem. Phys. 17, 31769 (2015)** |
| FePc | **Graphene sponge** | ***0.25 mAh cm-2** | **N/A** | **135** | **J. Am. Chem. Soc. 136, 8941−8946 (2014)** |
| DBBQ  TEMPO | **LiFePO4/** **LiSICON** | **0.25 mAh** | **8** | **50** | **Nat. Energy 2, 17118 (2017)** |
| DBBQ  TEMPO | **Carbonized polyacrylonitrile**  **electrodes** | **0.5 mAh** | **10** | **20** | **J. Am. Chem. Soc. 140, 1428 (2018)** |
| DMPZ | **PEDOT:PSS** | ***0.5 mAh cm-2** | **N/A** | **25** | **Adv. Energy Mater. 7, 1602417 (2017)** |
| DMPZ | **N/A** | ***500 mAh g-1** | **N/A** | **45** | **Nat. Energy 1, 16066 (2016)** |
| DMPZ | **FEC+** **solid electrolyte membrane** | ***2000 mAh g-1** | **N/A** | **60** | **Adv. Energy Mater. 7, 1701232 (2017)** |
| Heme | **N/A** | ***600 mAh g-1** | **N/A** | **50** | **Nat. Commun. 7, 12925 (2016)** |
| PTIO  SDS | **N/A** | **0.125 mAh** | **19** | **150** | **ACS Energy Lett. 2, 2659 (2017)** |
| DMN-AZAD | **Nafion-based Al2O3 layer** | **0.6 mAh** | **30** | **50** | **ACS Energy Lett. 5, 2122 (2020)** |
| DABCO  DMPZ | **N/A** | **1.2 mAh** | **60** | **50** | **ACS Catal. 9, 9914 (2019)** |
| TESI | **N/A** | **0.25 mAh** | **25** | **100** | **Nat. Commun. 10, 3543 (2019)** |
| Vitamin K2  TEMPO | **LiFePO4** | **0.66 mAh** | **8.58** | **13** | **Adv. Funct. Mater. 29, 1805623 (2019)** |
| hemoglobin | **N/A** | ***500 mAh g-1** | **N/A** | **20** | **J. Phys. Chem. C 123, 23433 (2019)** |
| V(acac)3 | **N/A** | ***500 mAh g-1** | **N/A** | **100** | **Angew.Chem. Int. Ed. 58,12553 (2019)** |
| Cu (tdfc) | **Solid electrolyte** | **0.45 mAh** | **68** | **150** | **Mater. Horiz., 7, 214 (2020)** |
| MA-C60 | **N/A** | **0.6 mAh** | **36** | **60** | **ACS Nano 13, 9190 (2019)** |
| DMPO | **hierarchical CNT electrode** | ***1000 mAh g-1** | **N/A** | **240** | **Adv. Energy Mater. 1904187, (2020)** |
| LiCl | **N/A** | **0.8 mAh** | **57** | **71** | **Batteries & Supercaps (2020) 10.1002/batt.202000198** |
| DMTFA  TEMPO | **High concentration LiNO3** | ***1000 mAh g-1** | **N/A** | **100** | **ACS Appl. Mater. Inter. 12, 18490 (2020)** |

*****Some of the actual capacities cannot be calculated as there is not sufficient information in the publications to perform the calculation.

**#**The accumulated capacity is the total capacity achieved after long-term cycling. The accumulated capacity is calculated by multiplying the reversible capacity by the cycle number.

**Supplementary References**

1 Jalilov, A. S. *et al.* Perylene diimide as a precise graphene-like superoxide dismutase mimetic. *ACS Nano* **11**, 2024-2032 (2017).

2 Nakatsuji, S. i. *et al.* Spin-carrying naphthalenediimide and perylenediimide derivatives. *Bull. Chem. Soc. Japan* **83**, 1079-1085 (2010).

3 Zhang, J. *et al.* A versatile functionalized ionic liquid to boost the solution-mediated performances of lithium-oxygen batteries. *Nat. Commun.* **10**, 1-10 (2019).

4 Zhang, J., Sun, B., Xie, X., Zhao, Y. & Wang, G. A bifunctional organic redox catalyst for rechargeable lithium-oxygen batteries with enhanced performances. *Adv. Sci.* **3**, 1500285 (2016).

5 Sun, B., Huang, X., Chen, S., Munroe, P. & Wang, G. Porous graphene nanoarchitectures: An efficient catalyst for low charge-overpotential, long life, and high capacity lithium-oxygen batteries. *Nano Lett.* **14**, 3145-3152.

6 Zhao, Y. *et al.* Cobalt-doped MnO2 ultrathin nanosheets with abundant oxygen vacancies supported on functionalized carbon nanofibers for efficient oxygen evolution. *Nano Energy* **54**, 129-137 (2018).

7 Neale, A. R. *et al.* Effect of cation structure on the oxygen solubility and diffusivity in a range of bis ((trifluoromethyl) sulfonyl) imide anion based ionic liquids for lithium-air battery electrolytes. *Phys. Chem. Chem. Phys.* **18**, 11251-11262 (2016).

8 Lim, H.-D. *et al.* Rational design of redox mediators for advanced Li-O2 batteries. *Nat. Energy* **1**, 1-9 (2016).

9 Husch, T. & Korth, M. Charting the known chemical space for non-aqueous lithium-air battery electrolyte solvents. *Phys. Chem. Chem. Phys.* **17**, 22596-22603 (2015).

10 Wu, D. *et al.* Perylene diimide-diamine/carbon black composites as high performance lithium/sodium ion battery cathodes. *J. Mater. Chem. A* **6**, 13613-13618 (2018).

11 Colvin, M. T. *et al.* Competitive electron transfer and enhanced intersystem crossing in photoexcited covalent TEMPO-perylene-3, 4: 9, 10-bis (dicarboximide) dyads: unusual spin polarization resulting from the radical-triplet interaction. *J. Phys. Chem. A* **114**, 1741-1748 (2010).

12 Xia, C. *et al.* Direct evidence of solution-mediated superoxide transport and organic radical formation in sodium-oxygen batteries. *J. Am. Chem. Soc.* **138**, 11219-11226 (2016).

13 Aetukuri, N. *et al.* Solvating additives drive solution-mediated electrochemistry and enhance toroid growth in non-aqueous Li-O2 batteries. *Nat. Chem.* **7**, 50-56 (2015).

14 Mahne, N. et al. Singlet oxygen generation as a major cause for parasitic reactions during cycling of aprotic lithium-oxygen batteries. *Nat. Energy* **2**, 1-9 (2017).

15 Mourad, E. et al. Singlet oxygen from cation driven superoxide disproportionation and consequences for aprotic metal-O2 batteries. *Energy Environ. Sci.* **12**, 2559-2568 (2019).

16 Liang, Z., Zou, Q., Xie, J. & Lu, Y.-C. Suppressing singlet oxygen generation in lithium-oxygen batteries with redox mediators. *Energy Environ. Sci.* **13**, 2870-2877 (2020).
